# Supplementary material for: A photocatalytic ensemble HP-T@Au-Fe3O4: synergistic and balanced operation in Kumada and Heck coupling reactions
Source: Royal Society of Chemistry journal article supplement (doi:10.1039/d0gc02082f), 2020-01-01
Supplement: d0gc02082f1.pdf [file d0gc02082f1.pdf]

### Electronic Supplementary Information

Photocatalytic ensemble **HP-T@ Au-Fe<sub>3</sub>O<sub>4</sub>**: Synergistic and balanced operation in Kumada and Heck coupling reactions.

**Harpreet Kaur, Manoj Kumar\*, Vandana Bhalla\***

*Department of Chemistry, UGC Sponsored Centre for Advanced Studies-II, Guru Nanak Dev University, Amritsar 143005, and Punjab, India*

[vanmanan@yahoo.co.in](mailto:vanmanan@yahoo.co.in)

- S3** General Experimental procedures
- S4** Synthetic scheme for derivative **2**.
- S5** Procedures for Kumada cross coupling and Heck coupling reactions.
- S6** Comparison of catalytic activity of **HP-T@Au-Fe<sub>3</sub>O<sub>4</sub>** nanohybrid material in Kumada coupling reaction for the preparation of biaryl derivatives reported in literature.
- S7** Comparison of catalytic activity of **HP-T@Au-Fe<sub>3</sub>O<sub>4</sub>** nanohybrid material in Heck coupling reaction reported in literature.
- S8** <sup>1</sup>H NMR and <sup>13</sup>C NMR spectra of derivative **2**.
- S9** ESI-MS spectrum of derivative **2** and Elemental analysis of derivative **2**.
- S10** UV-vis absorption and emission spectra of derivative **2** upon varying water fraction.
- S11** UV-vis absorption spectra of derivative **2** upon increasing temperature and UV-vis absorption spectra of derivative **2** upon addition of Au<sup>3+</sup> and Fe<sup>3+</sup> ions.
- S12** DLS studies and TGA of **HP-T@ Au-Fe<sub>3</sub>O<sub>4</sub>** nanohybrid material.
- S13** Hysteresis loop of **HP-T@ Au-Fe<sub>3</sub>O<sub>4</sub>** nanohybrid material.
- S14** Overlay <sup>1</sup>H NMR spectra of (a) compound **2** and (b) its polymeric species after reaction of derivative **2** with AuCl<sub>3</sub> and FeCl<sub>3</sub> and GPC chromatogram of oxidized species **HP-T**.

- S15** UV-vis absorption of **HP-T** and A) Fluorescence spectra of **HP-T** and upon addition of bare Au-Fe<sub>3</sub>O<sub>4</sub> nanoparticles; (B) Spectral overlap of absorption spectrum of Au-Fe<sub>3</sub>O<sub>4</sub> NPs and fluorescence spectrum of oxidized species **HP-T**.
- S16** Kumada coupling reaction using different solvent systems and Kumada coupling reaction by varying different amount of catalytic system.
- S17** Calculations for TON/TOF and ICP-MS analysis of **HP-T@Au-Fe<sub>3</sub>O<sub>4</sub>** nanohybrid material.
- S18** ICP-MS analysis of whole reaction mixture.
- S19** Characterization data of compounds **5a-5h**
- S20** Characterization data of compounds **8a-8g**
- S21** <sup>1</sup>H-NMR spectra of compound **5a** and **5b**.
- S22** <sup>1</sup>H-NMR spectra of compound **5c** and **5d**.
- S23** <sup>1</sup>H-NMR spectra of compound **5e** and **5f**.
- S24** <sup>1</sup>H-NMR spectra of compound **5g** and **5h**.
- S25** <sup>1</sup>H-NMR spectra of compound **8a** and **8b**.
- S26** <sup>1</sup>H-NMR spectra of compound **8c** and **8d**.
- S27** <sup>1</sup>H-NMR spectra of compound **8e** and **8f**.
- S28** <sup>1</sup>H-NMR spectra of compound **8g**.
- S29** Recyclability graphs for Kumada coupling and Heck coupling reaction.

## GENERAL EXPERIMENTAL SECTION

**Materials and reagents:** All the reagents were purchased from Aldrich and were used without further purification. THF was dried over sodium and benzophenone as an indicator. UV-vis studies were performed in THF, distilled water and HEPES buffer (0.05 M) (pH = 7.05).

**Instrumentation:** UV-vis spectra were recorded on a SHIMADZU UV-2450 spectrophotometer, with a quartz cuvette (path length, 1 cm). The cell holder was thermostatted at 25°C. The fluorescence spectra were recorded with a SHIMADZU- 5301 PC spectrofluorimeter. The TEM and HR-TEM images were recorded in HR-TEM-JEM 2100 microscope. The dynamic light scattering (DLS) data were recorded with MALVERN Instruments (Nano-ZS). <sup>1</sup>H and <sup>13</sup>C NMR spectra were recorded on a BRUKER-AVANCE-II FT-NMR-AL 500 MHz and JEOL 400 MHz spectrophotometer using CDCl<sub>3</sub>, as solvent and tetramethylsilane, SiMe<sub>4</sub> as internal standards. Data are reported as follows: chemical shifts in ppm, multiplicity (s = singlet, d = doublet, t = triplet, m = multiplet, dd = doublet of doublet), coupling constants *J* (Hz), integration and interpretation. Silica gel 60 (60-120 mesh) was used for column chromatography.

### Procedure for analyte sensing by derivative 2

A 5.58 mg portion of compound **2** was dissolved in 10.0 mL of dry THF to prepare a 10<sup>-3</sup> M stock solution. This stock solution (15 μL) was further diluted with 1185 μL of double distilled water and 1800 μL of dry THF to prepare an experimental solution of derivative **2** (3.0 mL 5.0 μM) in Water/THF (4/6, v/v), pH 7.06, which was used for each UV-vis and fluorescence experiment. 10<sup>-1</sup> M to 10<sup>-3</sup> M solutions of Au<sup>3+</sup> and Fe<sup>3+</sup> metal ions as their perchlorate/chloride salts were used. In titration experiments, each time a 3 ml solution of **2** was taken in a quartz cuvette to record the spectra.

### Synthesis of Supramolecular Ensemble HP-T@Au-Fe<sub>3</sub>O<sub>4</sub> nanohybrid material

An aqueous solution of 38 μL of 10<sup>-3</sup> M AuCl<sub>3</sub> and 30 μL of 10<sup>-3</sup> M FeCl<sub>3</sub> was mixed into 3.0 mL of a 5.0 μM solution of compound **2** in an H<sub>2</sub>O/THF (4/6, v/v)

mixture. The reaction mixture was stirred at room temperature, and the color of solution changed from colourless to reddish brown after 1h; thereafter formation of brown **HP-T@AuFe<sub>3</sub>O<sub>4</sub>** nanohybrid material.

### Synthesis of Derivative 2.

A solution of [2,5-diphenyl-3,4-di(thiophen-2-yl)cyclopenta-2,4 dien-1-one] **2a** (0.2 g, 1.0 mmol) and [1,2-di(thiophen-2-yl)ethyne] **2b** (0.095 g, 1.0 mmol) were mixed in 2mL of diphenylether and refluxed for 24 h under an inert atmosphere (N<sub>2</sub>). After the completion of reaction, the reaction mixture was cooled down to r.t. and methanol (10 mL) was then added to it. The reaction mixture was kept for stirring at r.t for 1h. After this, methanol layer was decanted off, and the insoluble dark oil was subjected to column chromatography using 10:90 EtOH/hexane as an eluent to give (0.210 g, 75%) of compound **2** as a white solid. <sup>1</sup>H NMR (500 MHz, CDCl<sub>3</sub>) δ 7.91 (d, *J* = 5 Hz, 4H), 7.71 (d, *J* = 5 Hz, 4H), 7.46 (d, *J* = 5 Hz, 2H), 7.37 (d, *J* = 5 Hz, 2H), 7.20 – 7.18 (m, 2H), 7.01-6.99 (m, 4H), 6.61-6.56 (m, 2H), 6.47 (d, *J* = 5 Hz, 2H). <sup>13</sup>C NMR (75 MHz, CDCl<sub>3</sub>) δ 143.4, 141.2, 135.6, 130.5, 129.3, 126.9, 126.0, 125.7. The ESI-MS of C<sub>34</sub>H<sub>22</sub>S<sub>4</sub> showed a parent ion peak at *m/z* 559.6495 corresponding to [M + H]<sup>+</sup>. Elemental analysis: Found for C<sub>34</sub>H<sub>22</sub>S<sub>4</sub>: C, 73.08; H, 3.97; S, 22.95. Anal. Calcd for C<sub>34</sub>H<sub>22</sub>S<sub>4</sub>: 72.84; H, 3.66; S, 22.89.

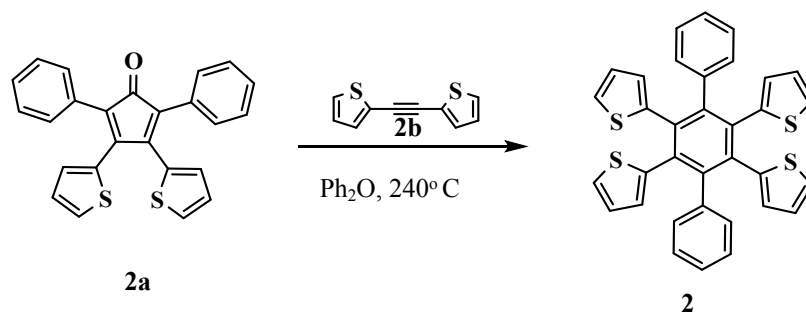

**Scheme S1.** Synthesis of derivative **2**

**General procedure for the photocatalytic Kumada cross coupling catalyzed by Supramolecular ensemble HP-T@AuFe<sub>3</sub>O<sub>4</sub>:** Chlorobenzene **3a** (100 mg, 1 mmol) was dissolved in THF (2 mL) in the presence of HP-T@AuFe<sub>3</sub>O<sub>4</sub> (200 uL) in a 10 mL RBF, then the Grignard reagent **4** (4 mmol) was slowly added dropwise. The solution was stirred for 20 min at RT under visible light irradiation. After the reaction was completed (TLC), The reaction mixture was diluted with water and ethyl acetate. The resultant organic layer was passed through anhydrous Na<sub>2</sub>SO<sub>4</sub> and was concentrated under reduced pressure to acquire the crude sample. The target products (**5a-5h**) were purified by flash chromatography using hexane as an eluent. The desired products **5a-5h** were found in excellent to good yield and confirmed from their spectroscopic and analytical data.

**General procedure for the photocatalytic Heck coupling catalyzed by Supramolecular ensemble HP-T@AuFe<sub>3</sub>O<sub>4</sub>:** A mixture of aryl-halides (**3a**, 100 mg, 1 mmol), acrylate (Me/Et/n-Bu, 1.2 mmol) and K<sub>2</sub>CO<sub>3</sub> (1 mmol) in the presence of HP-T@AuFe<sub>3</sub>O<sub>4</sub> (200 uL) was stirred for 2h at 40 °C under visible light irradiation. The reaction progress was screened by TLC at different time intervals. After the completion of the reaction, the reaction mixture was treated with water and extracted with ethyl acetate and the resultant organic layer was dried over anhydrous Na<sub>2</sub>SO<sub>4</sub> and was concentrated under reduced pressure to acquire the crude sample. The desired products (**8a-8g**) were purified by flash chromatography using hexane as an eluent. The desired products **8a-8g** were found in excellent to good yield and confirmed from their spectroscopic and analytical data.

**Tables S1.** Comparison of catalytic activity of HP-T@ Au-Fe<sub>3</sub>O<sub>4</sub> nano hybrid material for preparation of biaryl derivatives through Kumada coupling over other catalytic system reported in literature.

| S. No. | Publication                                          | Catalyst used                                                                                                   | Ar-X (X) | Solvent                   | Reaction condition | Photo catalysis     | Temp. (°C) | Recyclability | Yield (%) |     |
|--------|------------------------------------------------------|-----------------------------------------------------------------------------------------------------------------|----------|---------------------------|--------------------|---------------------|------------|---------------|-----------|-----|
|        |                                                      |                                                                                                                 |          |                           |                    |                     |            |               | X-Cl      | X-I |
| 1.     | Present Work                                         | HP-T@Au Fe <sub>3</sub> O <sub>4</sub>                                                                          | Cl       | H <sub>2</sub> O/THF      | Aerial atm.        | Yes (Visible light) | RT         | Yes           | 93        | 87  |
| 2.     | Angew. Chem. Int. Ed. 2019, <b>58</b> , 13030-13034. | Fe(acac) <sub>3</sub> and NHC                                                                                   | Cl       | Dry THF                   | N <sub>2</sub> atm | Yes (Blue LED)      | RT         | No            | 93-95     | --  |
| 3.     | Org. Lett. 2019, <b>21</b> , 50–55                   | Ni(xant)(o Tol)Cl                                                                                               | Cl       | Dry THF/ (Toluene or NMP) | N <sub>2</sub> atm | No                  | RT-60 °C   | No            | 93        | --  |
| 4.     | Adv. Synth. Catal. 2019, <b>361</b> , 2329-2336.     | Ni(dppe)Cl <sub>2</sub>                                                                                         | OTs      | Dry THF                   | Ar atm.            | No                  | 23 °C      | No            | 94        | --  |
| 5.     | ACS Appl. Nano Mater. 2018, <b>1</b> , 6950-6958.    | Fe (II) NPs. (SAFe)                                                                                             | I/Br     | Dry THF                   | Ar atm.            | No                  | 75 °C      | Yes           | 13        | 96  |
| 6.     | J. Am. Chem. Soc. 2018, <b>140</b> , 13628-13633.    | Ni-Li-Olefin Complex                                                                                            | Cl/Br    | MTBE                      | Ar atm.            | No                  | -50 °C     | No            | 60-70     | --  |
| 7.     | Organometallics 2017, <b>36</b> , 255-265.           | [Ni(IMe)] <sub>2</sub> (μ-Cl)(μ:η <sup>1</sup> , η <sup>2</sup> -C <sub>6</sub> H <sub>5</sub> )                | Cl       | Dry THF                   | N <sub>2</sub> atm | No                  | RT         | No            | 85        | --  |
| 8.     | Chem Asian J. 2017 <b>12</b> , 1234-1239.            | Co(PMe <sub>3</sub> ) <sub>3</sub> (1-Si(Me) <sub>2</sub> -2-(PPh <sub>2</sub> )C <sub>6</sub> H <sub>4</sub> ) | Cl       | Toluene                   | N <sub>2</sub> atm | No                  | 80 °C      | No            | 85        | --  |
| 9.     | Adv. Synth. Catal. 2016, <b>358</b> , 2449-2459.     | Au supported Ni NPs                                                                                             | I        | Dry THF                   | Ar atm.            | No                  | 75 °C      | Yes           | --        | 90  |

**Tables S2.** Comparison of catalytic activity of HP-T@ Au-Fe<sub>3</sub>O<sub>4</sub> nanohybrid material for Heck coupling reaction over other catalytic system reported in literature.

| S. No. | Publication                                           | Catalyst used                                                            | Ar-X (X) | Base/Additive                         | Solvent                | Photo catalysis | Reaction Temp. (°C) | Recyclability | Yield(%) / Time |           |
|--------|-------------------------------------------------------|--------------------------------------------------------------------------|----------|---------------------------------------|------------------------|-----------------|---------------------|---------------|-----------------|-----------|
|        |                                                       |                                                                          |          |                                       |                        |                 |                     |               | X-Cl            | X-I       |
| 1.     | Present Work                                          | HP-T@Au-Fe <sub>3</sub> O <sub>4</sub> NPs                               | Cl       | K <sub>2</sub> CO <sub>3</sub>        | Neat                   | Yes             | RT-40 °C            | Yes           | 82/2 h          | 91/2 h    |
| 2.     | Green Chem. 2019, <b>21</b> , 1718-1734.              | Fe <sub>3</sub> O <sub>4</sub> @SiO <sub>2</sub> @Im[Cl]Co(III)-melamine | Cl       | Mn powder                             | EtOH                   | No              | Reflux              | Yes           | 82/3.6 h        | 91/1.3 h  |
| 3.     | J. Am. Chem. Soc. 2019, <b>141</b> , 1928–1940        | Pd@EVOH                                                                  | I/Br     | KOAc                                  | Toluene or NMP         | No              | 95 °C               | Yes           | --              | 91/24 h   |
| 4.     | Org. Biomol. Chem., 2019, <b>17</b> , 8969–8976       | Pd(II)–NHC complex                                                       | Br/Cl    | K <sub>3</sub> PO <sub>4</sub> /TBAB  | Water                  | No              | 110 °C              | Yes           | 70/12 h         | --        |
| 5.     | Green Chem., 2018, <b>20</b> , 1506-1514              | Pd-Ni NPs                                                                | I/Br/Cl  | K <sub>2</sub> CO <sub>3</sub>        | H <sub>2</sub> O/Et OH | No              | (MW) 120 °C         | Yes           | 82/10 min       | 88/10 min |
| 6.     | J. Am. Chem. Soc. 2018, <b>140</b> , 16929–16935      | CuCl                                                                     | Br       | Cs <sub>2</sub> CO <sub>3</sub>       | DMSO/THF               | No              | 60 °C               | No            | --              | 82/4 h    |
| 7.     | ACS Sustainable Chem. Eng. 2018, <b>6</b> , 8223–8229 | Au NPS                                                                   | I/Br/Cl  | K <sub>2</sub> CO <sub>3</sub>        | Water                  | Yes             | RT                  | Yes           | 60/6 h          | 89/1 h    |
| 8.     | Chemistry Select 2019, <b>4</b> , 6913 –6916          | NiBr <sub>2</sub> (PPh <sub>3</sub> ) <sub>2</sub>                       | I/Br/Cl  | TBAB Zn powder, BMIM.O Tf             | DMA                    | No              | 120 °C              | No            | 50/4 h          | 75/4 h    |
| 9.     | Green Chem., 2017, <b>19</b> , 1353–1361              | Co-MS@MNPs/CS                                                            | I/Br/Cl  | K <sub>3</sub> PO <sub>4</sub>        | PEG                    | No              | 80 °C               | Yes           | 71/1 h          | 88/1 h    |
| 10.    | New J. Chem., 2017, <b>41</b> , 3172--3176            | Pd <sub>2</sub> (dba) <sub>3</sub>                                       | Br       | P(tBu) <sub>3</sub> -HBF <sub>4</sub> | Toluene                |                 | 95 °C               |               | 83              |           |

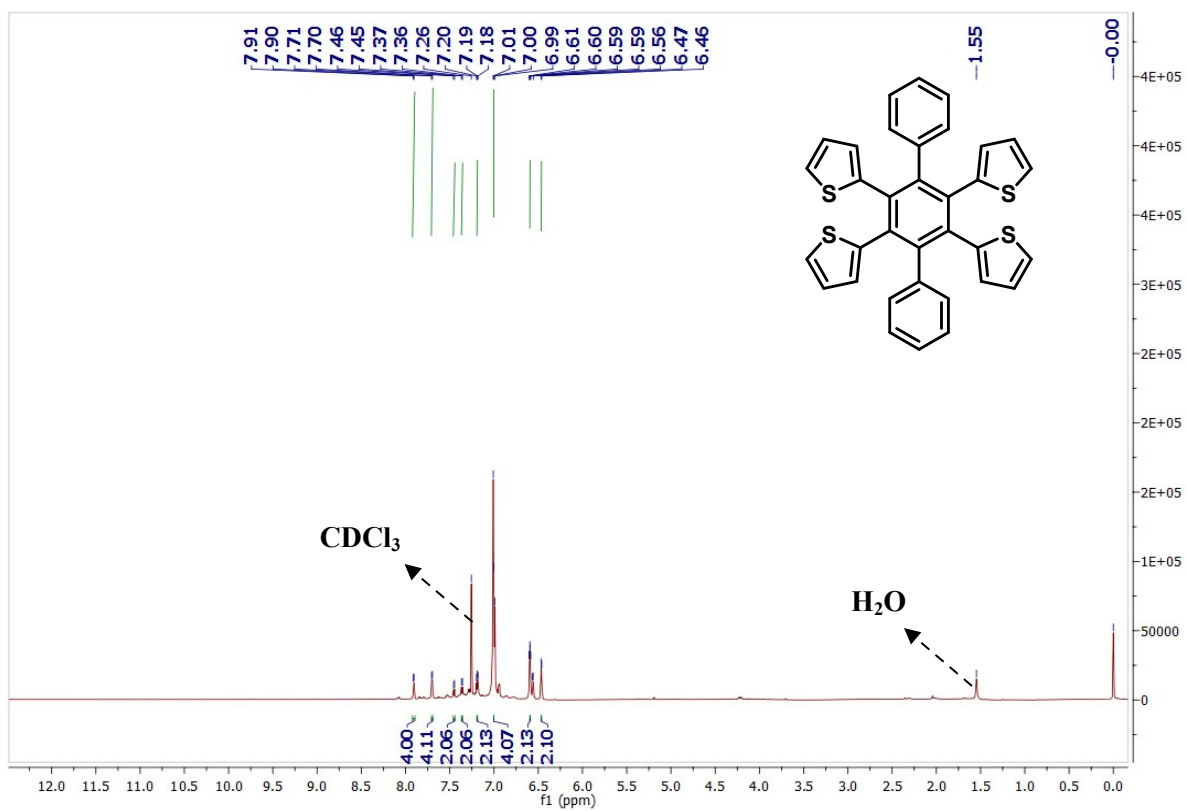

Fig. S1A <sup>1</sup>H NMR spectra (CDCl<sub>3</sub>, 500 MHz, ppm) of derivative 2.

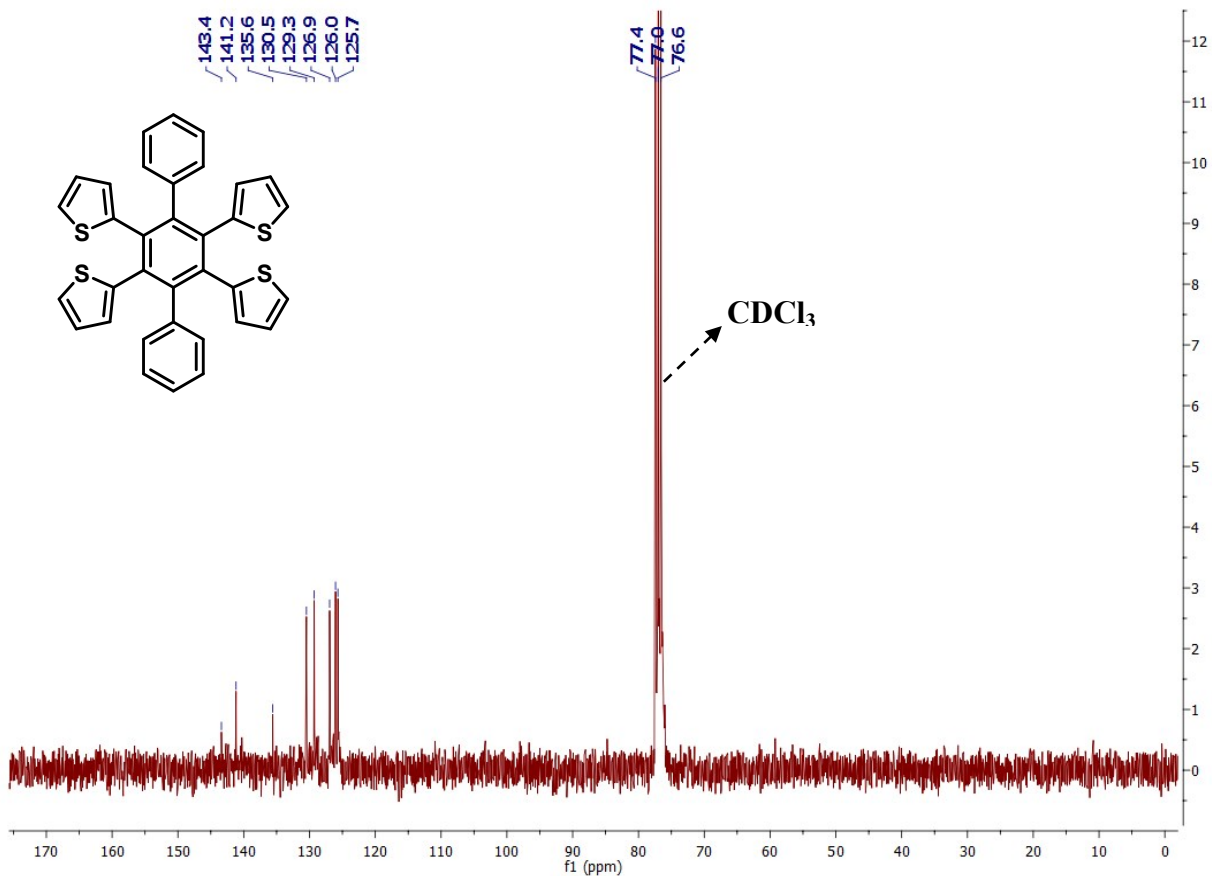

Fig. S1B <sup>13</sup>C NMR spectra (CDCl<sub>3</sub>, 75 MHz, ppm) of derivative 2.



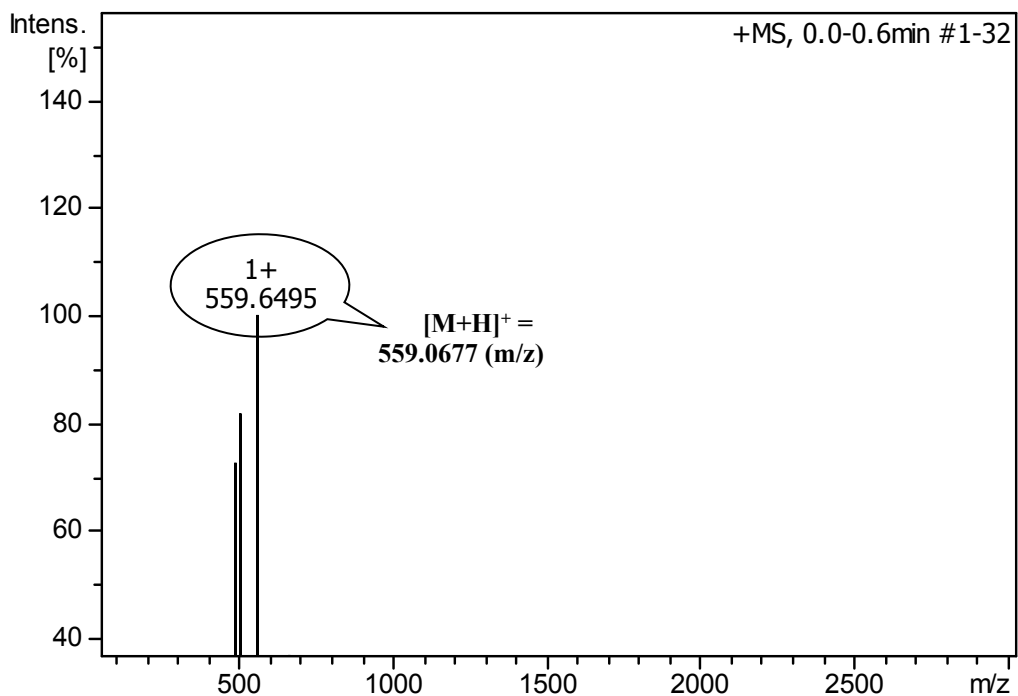

**Fig. S1C** ESI-MS spectrum of derivative **2**.

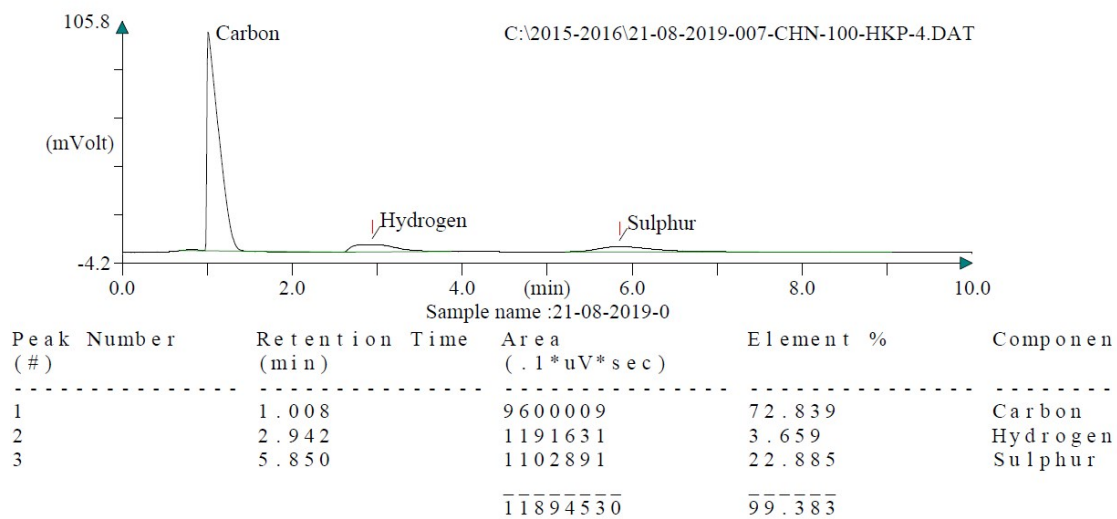

**Fig. S1D** Elemental Analysis of derivative **2**.

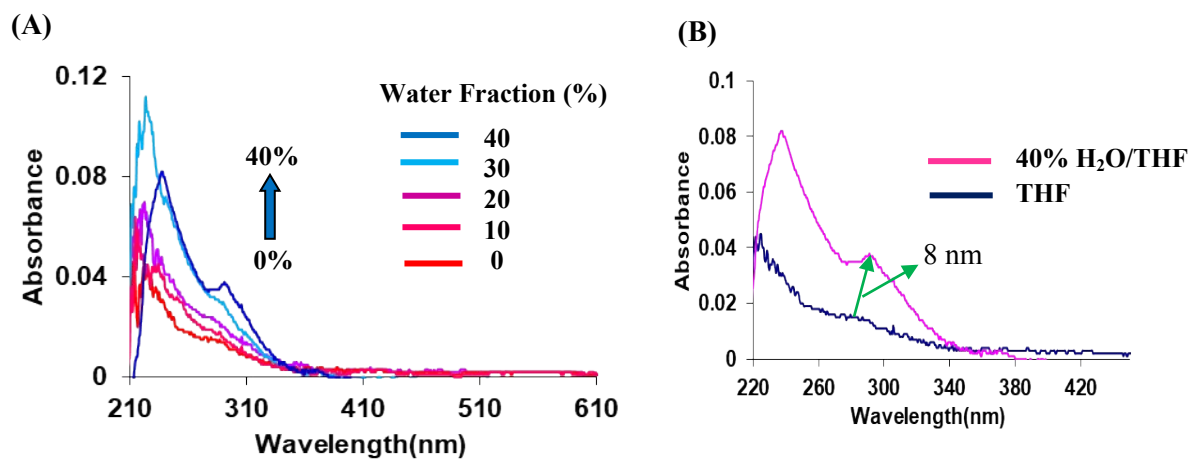

**Fig. S2** UV-vis absorption spectra of derivative **2** ( $5\mu\text{M}$ ) (A) showing variation in  $\text{H}_2\text{O}/\text{THF}$  upto 40% water fraction indicating the AIEE behavior (B) showing bathochromic shift upon addition of water (40% water fraction) to THF solution of derivative **2**.

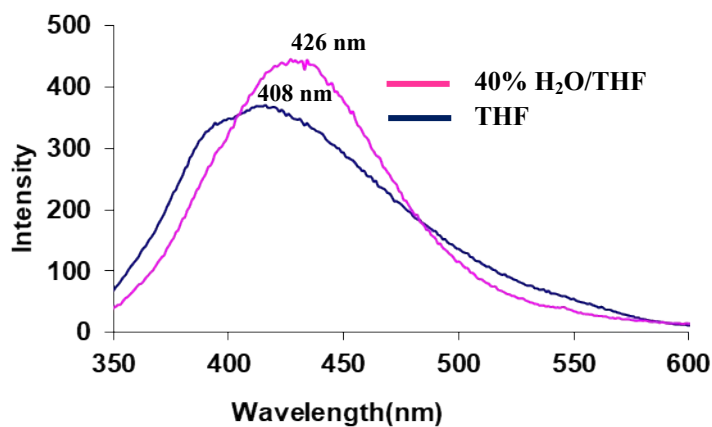

**Fig. S3** Fluorescence spectra of derivative **2** ( $5\mu\text{M}$ ) showing variation in  $\text{H}_2\text{O}/\text{THF}$  upto 40% water fraction indicating the AIEE behaviour and showing bathochromic shift upon addition of water (40% water fraction) to THF solution of derivative **2**.

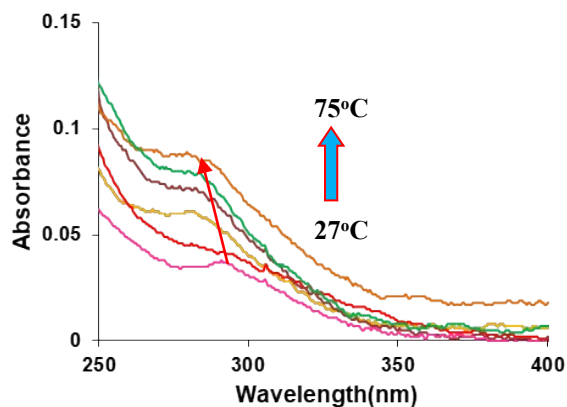

**Fig. S4** UV-vis spectra of derivative **2** in H<sub>2</sub>O/THF (4:6; v/v) mixture upon increasing temperature from room temperature to 75 °C, indicating the formation of *J*-aggregates.

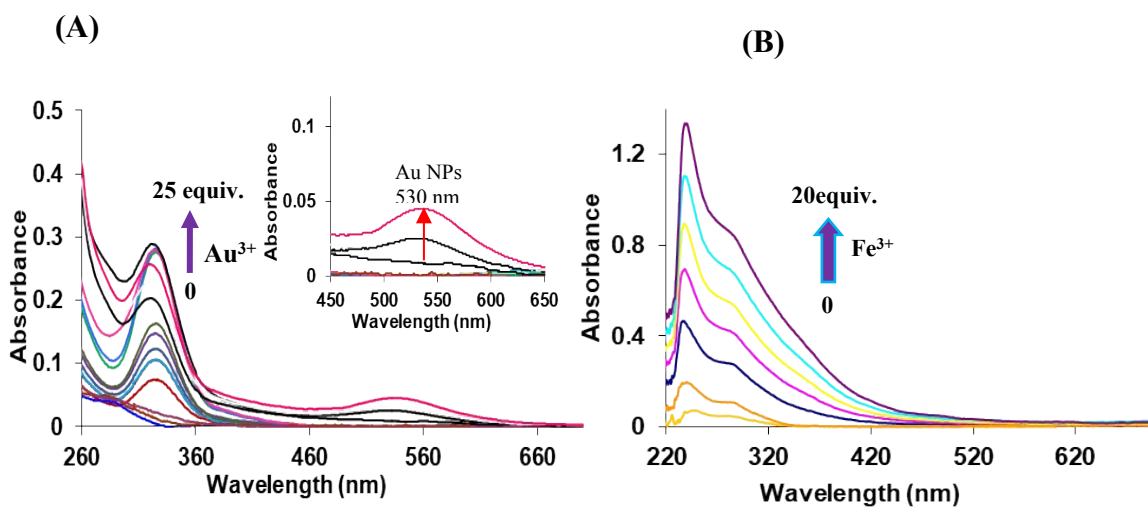

**Fig. S5** UV-vis spectra of derivative **2** (5 μM) upon addition of (A) Au<sup>3+</sup> ions (0-25 equiv.), indicate the formation of Au NPs. (B) Fe<sup>3+</sup> ions (20 equiv.) indicate the interaction between Fe<sup>3+</sup> ions and derivative **2**.

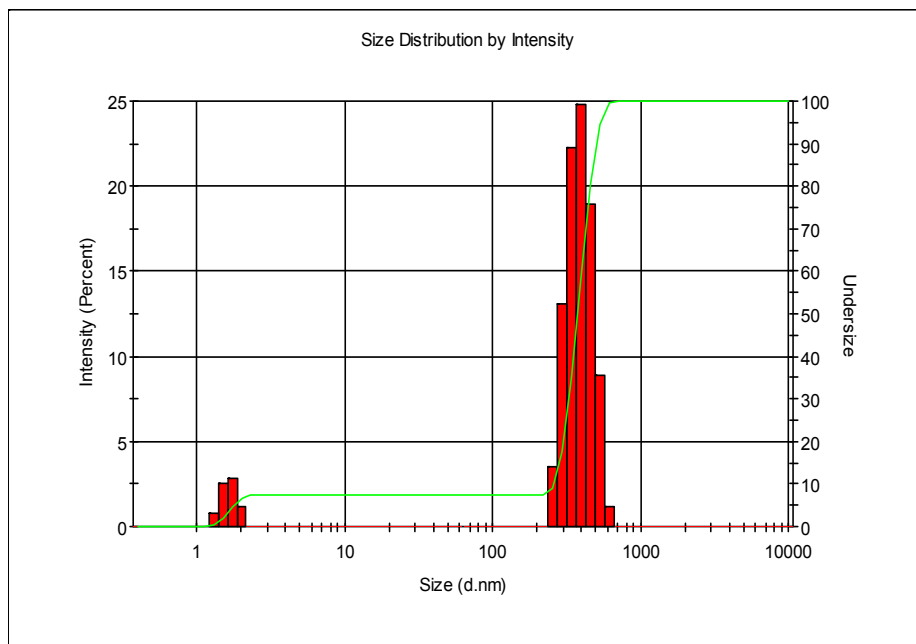

**Fig. S6** DLS studies of **HP-T@Au-Fe<sub>3</sub>O<sub>4</sub>** nanohybrid material indicated the presence of particles having size in the range of 1.5-2.0 nm.

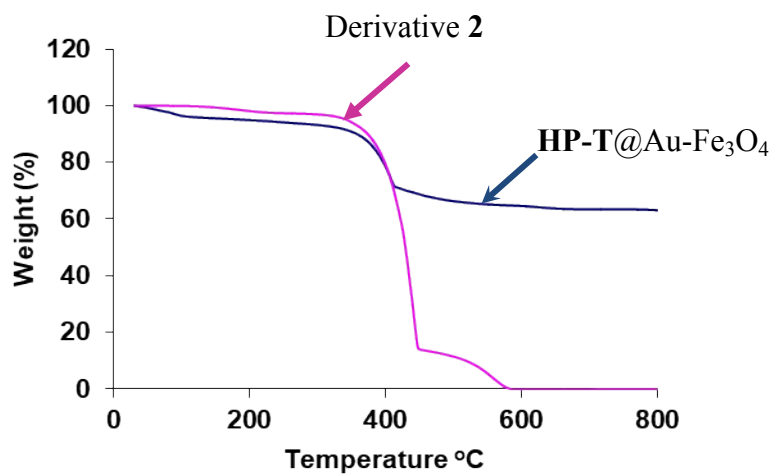

**Fig. S7** Thermogravimetric analysis (TGA) of derivative **2** and supramolecular ensemble **HP-T@Au-Fe<sub>3</sub>O<sub>4</sub>**.

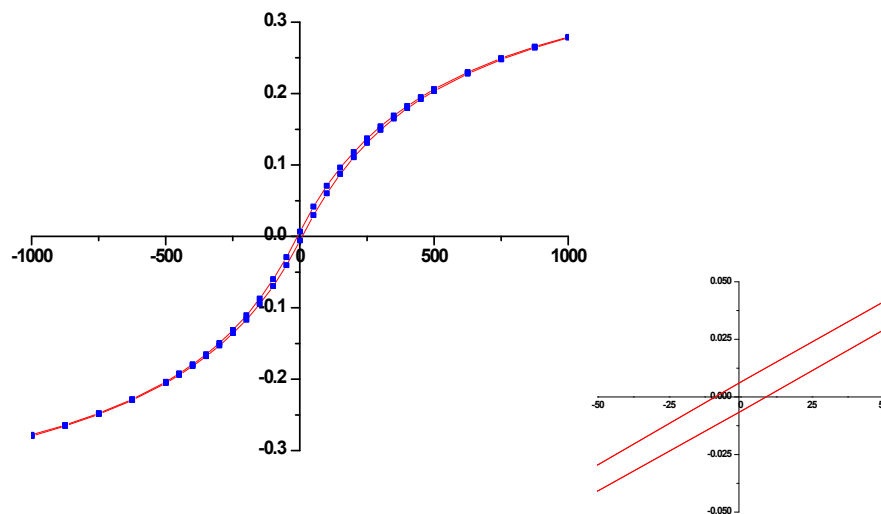

**Fig. S8** Hysteresis loop of **HP-T@Au-Fe<sub>3</sub>O<sub>4</sub>** nanohybrid material at room temperature. Inset showing expanded curve.

**Table S3.** Showing the coercivity, magnetization values obtained from Hysteresis loop of polymer capsulated Au-Fe<sub>3</sub>O<sub>4</sub> nanohybrid material at room temperature; 25°C.

| Parameter                             | Value  | Parameter definition                            |
|---------------------------------------|--------|-------------------------------------------------|
| H <sub>c</sub> (Oe)                   | 8.760  | Coercive Field: Field at which M/H changes sign |
| M <sub>r</sub> (emu g <sup>-1</sup> ) | 0.339  | Remanent Magnetization: M at H=0                |
| M <sub>s</sub> (emu g <sup>-1</sup> ) | 27.65  | Saturation Magnetization: maximum M measured    |
| S                                     | 0.0122 | Squareness = M <sub>r</sub> /M <sub>s</sub>     |

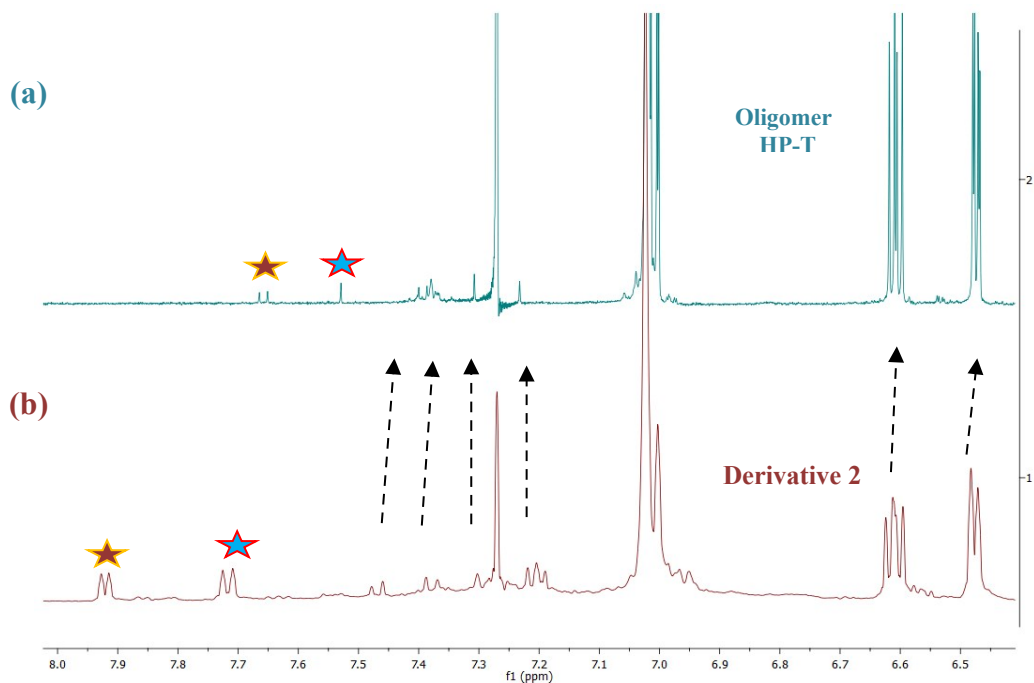

**Fig. S9** Overlay  $^1\text{H}$  NMR spectra of (a) **HP-T** after reaction of derivative **2** with  $\text{AuCl}_3$  and  $\text{FeCl}_3$  in  $\text{CDCl}_3$  and (b) derivative **2**

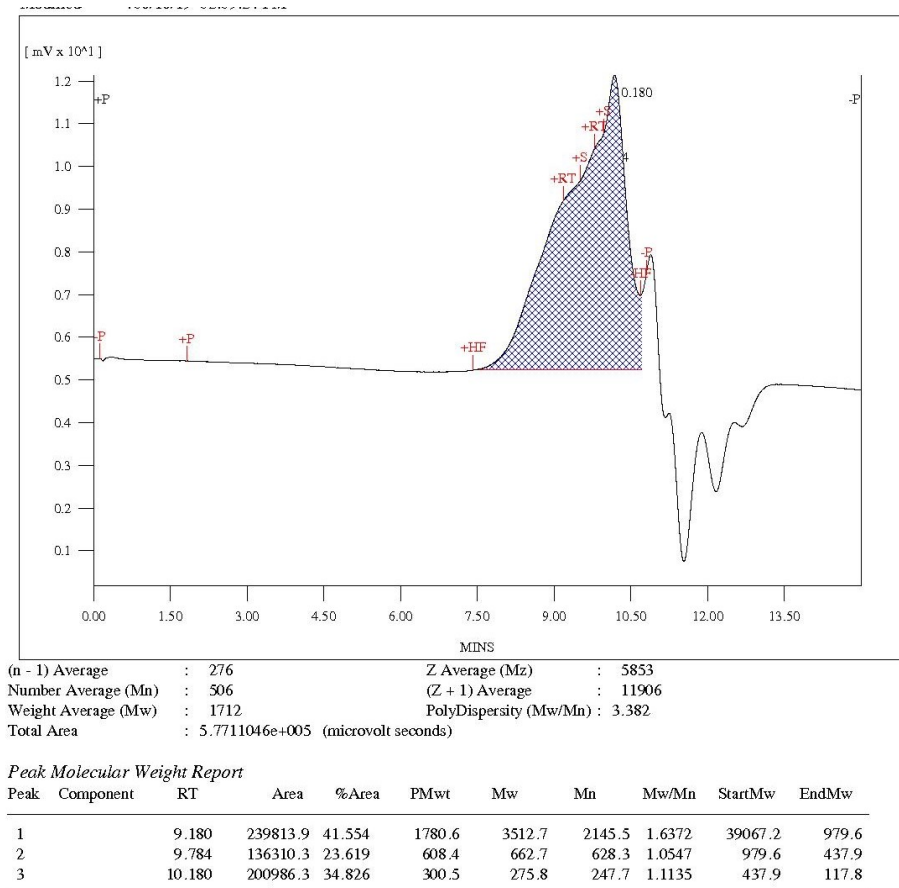

**Fig. S10** GPC Chromatogram of oligomeric species **HP-T**.

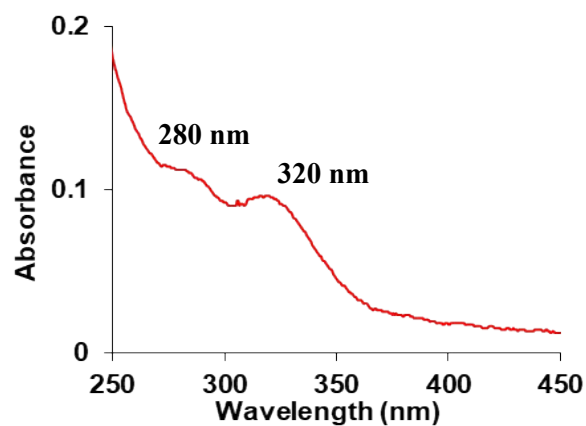

**Fig. S11** UV-vis spectra of **HP-T** (5  $\mu$ M) in  $H_2O/THF$  (4:6, v/v) mixture.

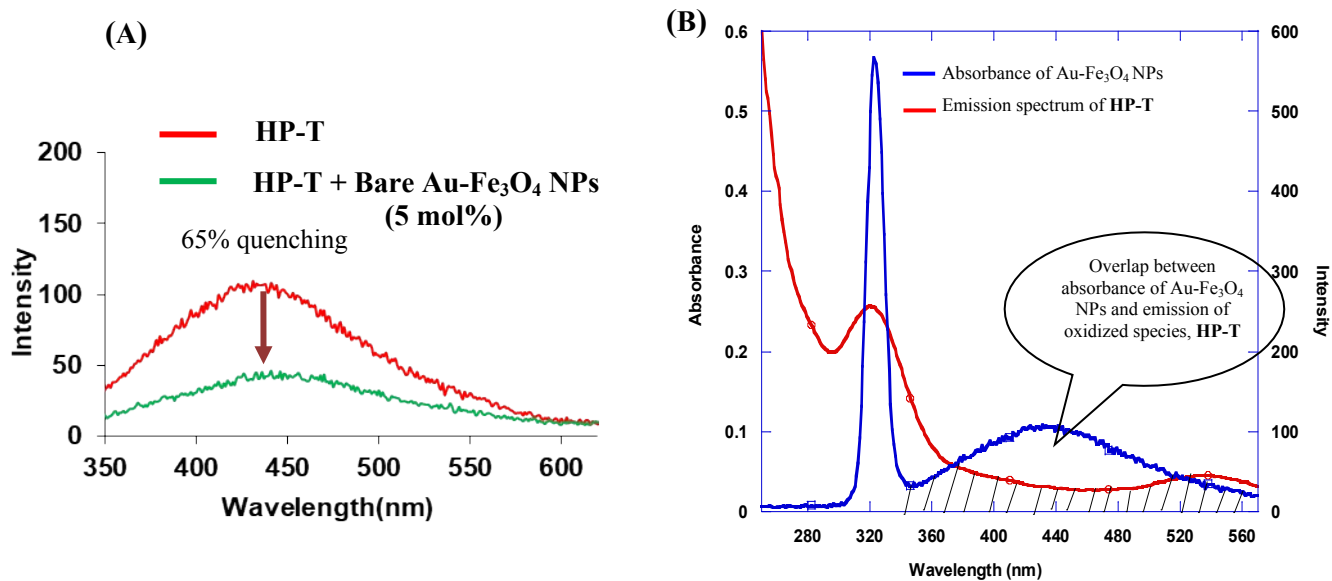

**Fig. S12** (A) Fluorescence spectra of oxidized species, **HP-T**, in  $H_2O/THF$  (4:6) upon addition of bare  $Au-Fe_3O_4$  nanoparticles,  $\lambda_{ex}=290$  nm. (B) Spectral overlap of absorption spectrum of  $Au-Fe_3O_4$  NPs and fluorescence spectrum of **HP-T** in  $H_2O/THF$  (4:6) mixture showing energy transfer from **HP-T** to  $Au-Fe_3O_4$  NPs.

**Table S4.** Kumada coupling between aryl chloride (1 mmol), *p*-tolylmagnesium bromide (4 mmol) catalysed by **HP-T@ Au-Fe<sub>3</sub>O<sub>4</sub>** nanohybrid material in different solvents.

| Entry | Solvent              | Yield/Time |
|-------|----------------------|------------|
| 1.    | H <sub>2</sub> O/THF | 93/20 min. |
| 2.    | Dioxane              | 93/20 min. |
| 3.    | Toluene              | 80/45 min. |

**Table S5.** Kumada Coupling between chlorobenzene **3a** (1 mmol), *p*-tolylmagnesium bromide **4** (4 mmol) using various amount of catalytic system.

| Entry | HP-T@AuFe <sub>3</sub> O <sub>4</sub> (mmol) | Time   | Yield (%) | TON <sup>a</sup> | TOF (h <sup>-1</sup> ) <sup>a</sup> |
|-------|----------------------------------------------|--------|-----------|------------------|-------------------------------------|
| 1.    | 6 mmol                                       | 15 min | 94%       | 522.22           | 2088.88                             |
| 2.    | 5 mmol                                       | 20 min | 93%       | 620              | 1878.78                             |
| 3.    | 4 mmol                                       | 30 min | 89%       | 741.66           | 1483.33                             |
| 4.    | 2 mmol                                       | 1 h    | 84%       | 1400             | 1400                                |
| 5.    | 1 mmol                                       | 3 h    | 78%       | 2600             | 866.66                              |
| 6.    | 0.5 mmol                                     | 6 h    | 72%       | 4800             | 800                                 |

a) w.r.t Au<sup>3+</sup> ions (mmol) in **HP-T@ Au-Fe<sub>3</sub>O<sub>4</sub>** nanohybrid material



i) Calculations of turnover number (TON) and turnover frequencies (TOF) of the catalyst.

$$\text{TON} = \frac{\text{no. of moles of product formed}}{\text{Moles of catalyst used}} \times \% \text{ yield of the product}$$

$$\text{TOF} = \text{TON} / \text{time of reaction}$$

ii) To calculate moles of Au NPs and Fe<sub>3</sub>O<sub>4</sub> NPs in **HP-T@** Au-Fe<sub>3</sub>O<sub>4</sub> nanohybrid material (5 mmol).

$$0.005 \text{ M} = \frac{\text{given weight (X)}}{\text{Molecular weight of Au/Fe}_3\text{O}_4 \text{ NPs}}$$

1 mol of AuCl<sub>3</sub> used to form 1 mol of Au NPs in nanohybrid material

196.966 g of Au NPs required = 303.33 g of AuCl<sub>3</sub>

$$(X) \text{ g of Au NPs required} = \frac{196.966}{303.33} \times (X) \text{ g of AuCl}_3$$

3 mol of FeCl<sub>3</sub> used to form 1 mol of Fe<sub>3</sub>O<sub>4</sub> NPs in nanohybrid material

231.495 g of Fe<sub>3</sub>O<sub>4</sub> NPs required = 3 x 162.20 g of FeCl<sub>3</sub>

$$(X) \text{ g of Fe}_3\text{O}_4 \text{ NPs required} = \frac{3 \times 162.20}{231.495} \times (X) \text{ g of FeCl}_3$$

**Table S6.** ICP-MS studies of **HP-T@** Au-Fe<sub>3</sub>O<sub>4</sub> nanohybrid material.

| Sample | Au      | Fe      | Pd  |
|--------|---------|---------|-----|
|        | ppb     | ppb     | ppb |
| H2     | 3841.49 | 1071.72 | ND  |

**ND MEANS LESS THAN 1 PPT**

**Table S7.** ICP-MS studies of whole reaction mixture (including **HP-T@** Au-Fe<sub>3</sub>O<sub>4</sub> nanohybrid material, chlorobenzene and *p*-tolymagnesium bromide) and reaction mixture (including chlorobenzene and *p*-tolymagnesium bromide

| Sample Code | Pd  |
|-------------|-----|
|             | PPB |
| R-N         | ND  |
| R-Mx        | ND  |

**ND MEANS LESS THAN 1 PPT**

**[5a]**<sup>1</sup>. [4-methyl-1,1'-biphenyl]: (Colorless solid, 93% yield). <sup>1</sup>H NMR (500 MHz, CDCl<sub>3</sub>, ppm)  $\delta$  = 7.57 (d,  $J$  = 10 Hz, 2H), 7.49 (d,  $J$  = 10 Hz, 2H), 7.41 (t,  $J$  = 7.5 Hz, 2H), 7.31 (t,  $J$  = 7.5 Hz, 1H), 7.25 (d,  $J$  = 5 Hz, 2H), 2.39 (s, 3H).

**[5b]**<sup>2</sup>. [4,4'-dimethyl-1,1'-biphenyl]: (Colorless solid, 90% yield). <sup>1</sup>H NMR (400 MHz, CDCl<sub>3</sub>, ppm)  $\delta$  = 7.47 (d,  $J$  = 8 Hz, 4H), 7.23 (d,  $J$  = 8 Hz, 4H), 2.38 (s, 6H).

**[5c]**<sup>1</sup>. [4-methoxy-4'-methyl-1,1'-biphenyl]: (Colorless solid, 94% yield). <sup>1</sup>H NMR (400 MHz, CDCl<sub>3</sub>, ppm)  $\delta$  = 7.48 (d,  $J$  = 8 Hz, 2H), 7.40 (d,  $J$  = 8 Hz, 2H), 7.16 (d,  $J$  = 8 Hz, 2H), 6.60 (d,  $J$  = 8 Hz, 2H), 3.69 (s, 3H), 2.31 (s, 3H).

**[5d]**<sup>3</sup>. [3,4'-dimethyl-1,1'-biphenyl]: (Colorless oil, 85% yield). <sup>1</sup>H NMR (400 MHz, CDCl<sub>3</sub>, ppm)  $\delta$  = 7.66 (dd,  $J$  = 8 Hz, 1H), 7.50 (dd,  $J$  = 8 Hz and 4 Hz, 2H), 7.44 (d,  $J$  = 8 Hz, 2H), 7.10 (d,  $J$  = 4 Hz, 2H), 6.95 (t,  $J$  = 8 Hz, 1H), 2.26 (s, 6H).

**[5e]**<sup>4</sup>. [2-(p-tolyl)thiophene]: (Colorless solid, 84% yield). <sup>1</sup>H NMR (400 MHz, CDCl<sub>3</sub>, ppm)  $\delta$  = 7.48-7.46 (m, 1H), 7.37-7.30 (m, 4H), 7.10-6.99 (m, 2H), 2.35 (s, 3H).

**[5f]**<sup>5</sup>. [2-(p-tolyl)naphthalene]: (Colorless oil, 87% yield). <sup>1</sup>H NMR (400 MHz, CDCl<sub>3</sub>, ppm)  $\delta$  = 8.01 (d,  $J$  = 8 Hz, 1H), 7.87-7.80 (m, 2H), 7.71 (t,  $J$  = 8 Hz, 2H), 7.60 (d,  $J$  = 8 Hz, 2H), 7.47-7.44 (m, 2H), 7.37-7.25 (m, 2H), 2.39 (s, 3H).

**[5g]**<sup>6</sup>. [4-methyl-4'-nitro-1,1'-biphenyl]: (Colorless solid, 70% yield). <sup>1</sup>H NMR (400 MHz, CDCl<sub>3</sub>, ppm)  $\delta$  = 8.23 (d,  $J$  = 8 Hz, 2H), 7.66 (d,  $J$  = 12 Hz, 2H), 7.57 (d,  $J$  = 8 Hz, 2H), 7.41 (d,  $J$  = 4 Hz, 2H), 2.62 (s, 3H).

**[5h]**. [2-cyclohexylnaphthalene]: (Colorless oil, 81% yield). <sup>1</sup>H NMR (400 MHz, CDCl<sub>3</sub>, ppm)  $\delta$  = 8.02 (d,  $J$  = 8 Hz, 1H), 7.88 (m, 4H), 7.73-7.60 (m, 2H), 7.48-7.44 (m, 2H), 7.37-7.26 (m, 2H), 1.30-1.26 (m, 5H), 0.87-0.83 (m, 6H).

**[8a].** [methyl cinnamate]: (Colorless solid, 82% yield).  $^1\text{H}$  NMR (400 MHz,  $\text{CDCl}_3$ , ppm)  $\delta = 7.63$  (d,  $J = 16$  Hz, 1H), 7.42-6.88 (m, 5H), 6.38 (d,  $J = 16$  Hz, 1H), 3.71(s, 3H).

**[8b].** [methyl (E)-3-(p-tolyl)acrylate]: (Colorless solid, 80% yield).  $^1\text{H}$  NMR (400 MHz,  $\text{CDCl}_3$ , ppm)  $\delta = 7.67$  (d,  $J = 16$  Hz, 1H), 7.42 (d,  $J = 8$  Hz, 2H), 7.19 (d,  $J = 8$  Hz, 2H), 6.40 (d,  $J = 16$  Hz, 1H), 3.80(s, 3H), 2.37(s, 3H).

**[8c].** [methyl (E)-3-(4-methoxyphenyl)acrylate]: (White solid, 79% yield).  $^1\text{H}$  NMR (400 MHz,  $\text{CDCl}_3$ , ppm)  $\delta = 7.65$  (d,  $J = 16$  Hz, 1H), 7.48 (d,  $J = 8$  Hz, 2H), 6.91 (d,  $J = 12$  Hz, 2H), 6.32 (d,  $J = 16$  Hz, 1H), 3.84(s, 3H), 3.80(s, 3H).

**[8d].** [methyl (E)-3-(m-tolyl)acrylate]: (Colorless solid, 75% yield).  $^1\text{H}$  NMR (400 MHz,  $\text{CDCl}_3$ , ppm)  $\delta = 7.67$  (d,  $J = 16$  Hz, 1H), 7.33 (d,  $J = 4$  Hz, 2H), 7.29-7.25 (m, 1H), 7.20 (d,  $J = 4$  Hz, 1H), 6.43 (d,  $J = 16$  Hz, 1H), 3.80(s, 3H), 2.37 (s, 3H).

**[8e].** [methyl (E)-3-(2,6-dimethylphenyl)acrylate]: (Colorless solid, 72% yield).  $^1\text{H}$  NMR (400 MHz,  $\text{CDCl}_3$ , ppm)  $\delta = 7.83$  (d,  $J = 16$  Hz, 1H), 7.08 (t,  $J = 12$  Hz, 1H), 6.06 (d,  $J = 16$  Hz, 1H), 3.79(s, 3H), 2.42 (s, 3H), 2.32 (s, 3H).

**[8f].** [ethyl (E)-3-(4-nitrophenyl)acrylate]: (Yellow solid, 78% yield).  $^1\text{H}$  NMR (500 MHz,  $\text{CDCl}_3$ , ppm)  $\delta = 8.37$  (d,  $J = 8$  Hz, 1H), 8.25 (d,  $J = 8$  Hz, 2H), 7.68 (d,  $J = 4$  Hz, 2H), 6.57 (d,  $J = 12$  Hz, 1H), 4.30 (q,  $J = 7.5$  Hz, 2H), 1.36 (t,  $J = 7.5$  Hz, 3H).

**[8g].** [butyl (E)-3-(m-tolyl)acrylate]: (Colorless solid, 77% yield).  $^1\text{H}$  NMR (400 MHz,  $\text{CDCl}_3$ , ppm)  $\delta = 7.64$  (d,  $J = 16$  Hz, 1H), 7.30 (d,  $J = 8$  Hz, 2H), 7.25-7.22 (m, 1H), 7.16 (d,  $J = 8$  Hz, 1H), 6.42 (d,  $J = 16$  Hz, 1H), 4.19 (t,  $J = 6$  Hz, 2H), 2.34 (s, 3H), 1.71-1.64 (m, 2H), 1.47-1.40 (m, 2H), 0.95 (t,  $J = 6$  Hz, 3H).

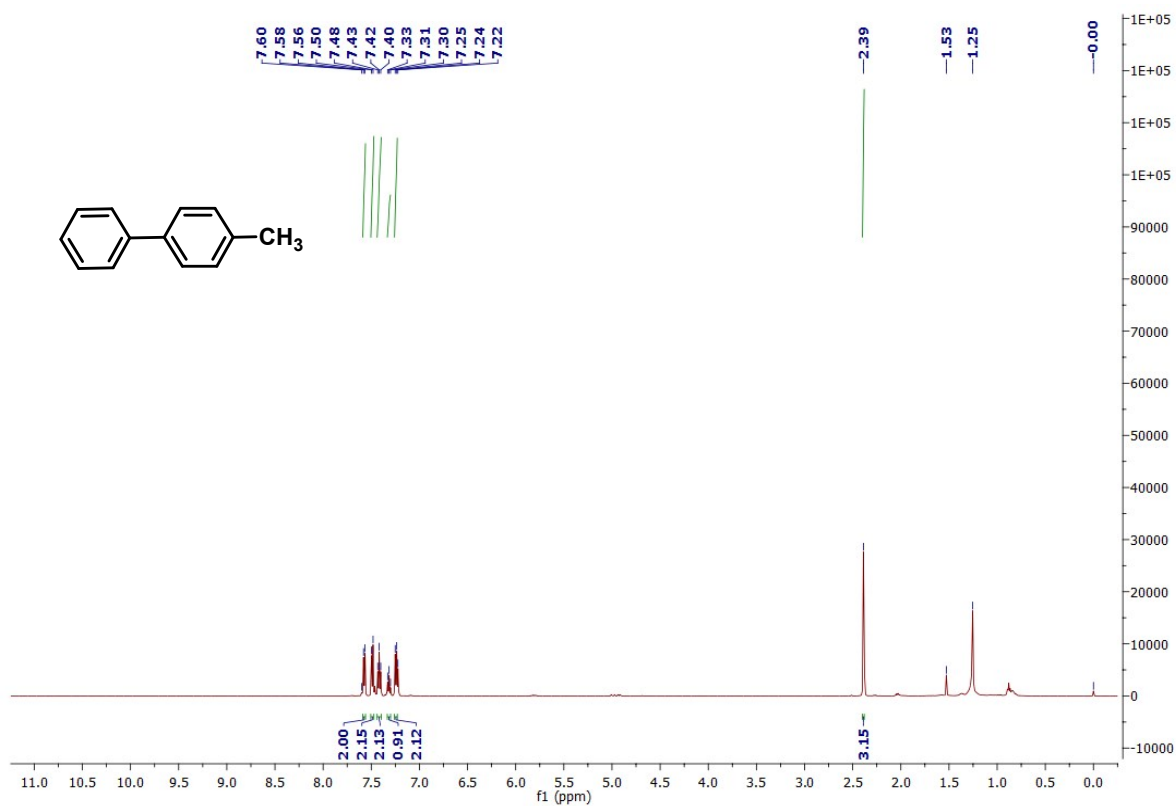

Fig. S15  $^1\text{H-NMR}$  spectra ( $\text{CDCl}_3$ , 500MHz, ppm) of compound 5a.

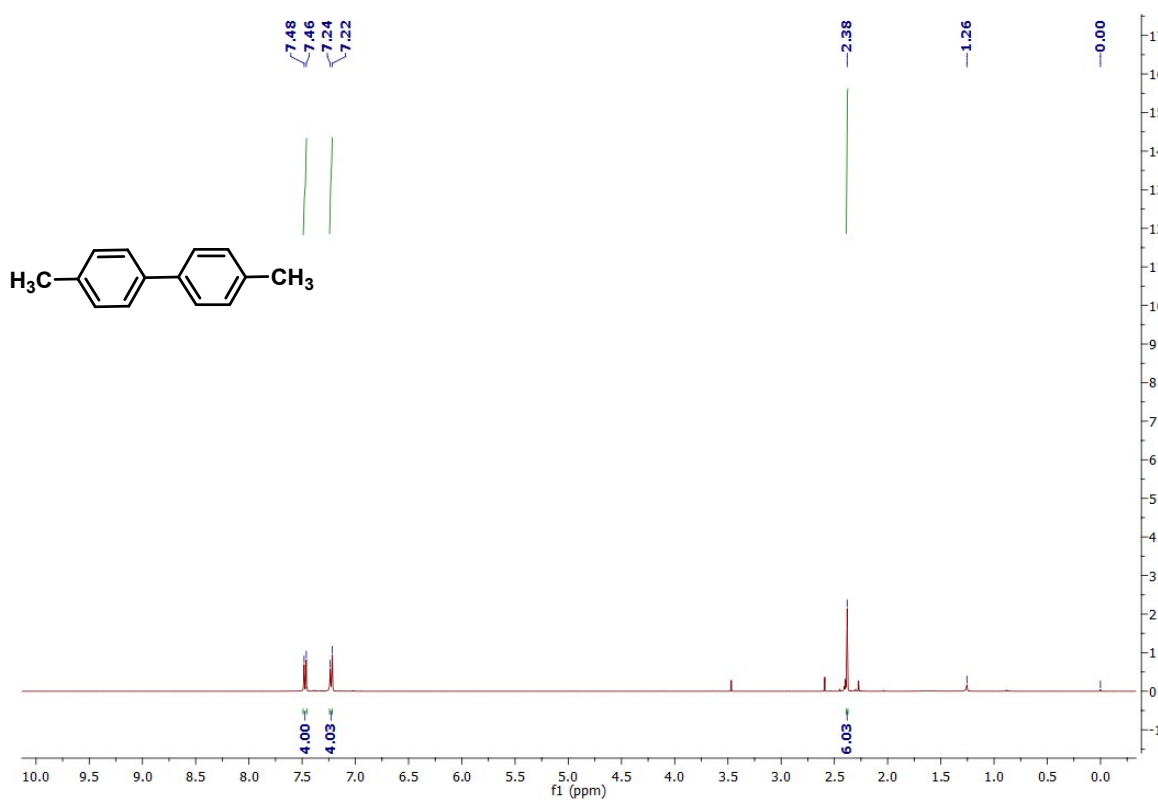

Fig. S16  $^1\text{H-NMR}$  spectra ( $\text{CDCl}_3$ , 400MHz, ppm) of compound 5b.

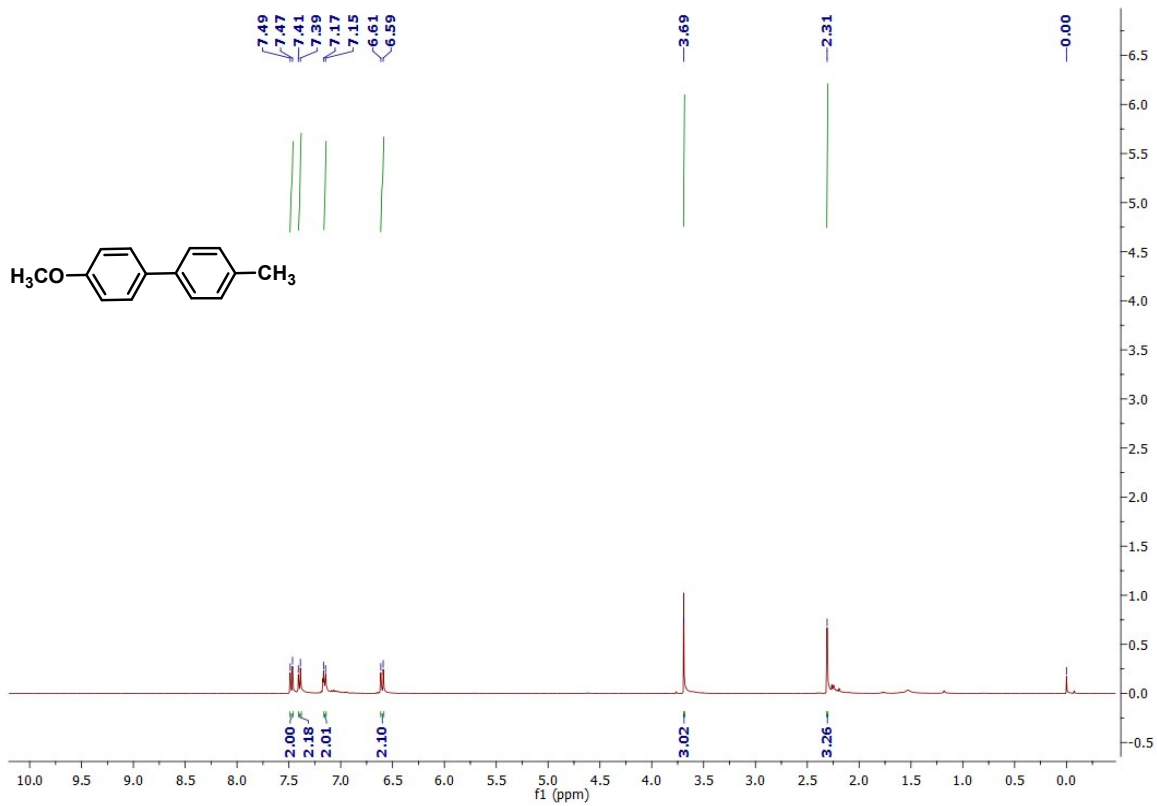

Fig. S17  $^1\text{H-NMR}$  spectra ( $\text{CDCl}_3$ , 400MHz, ppm) of compound 5c.

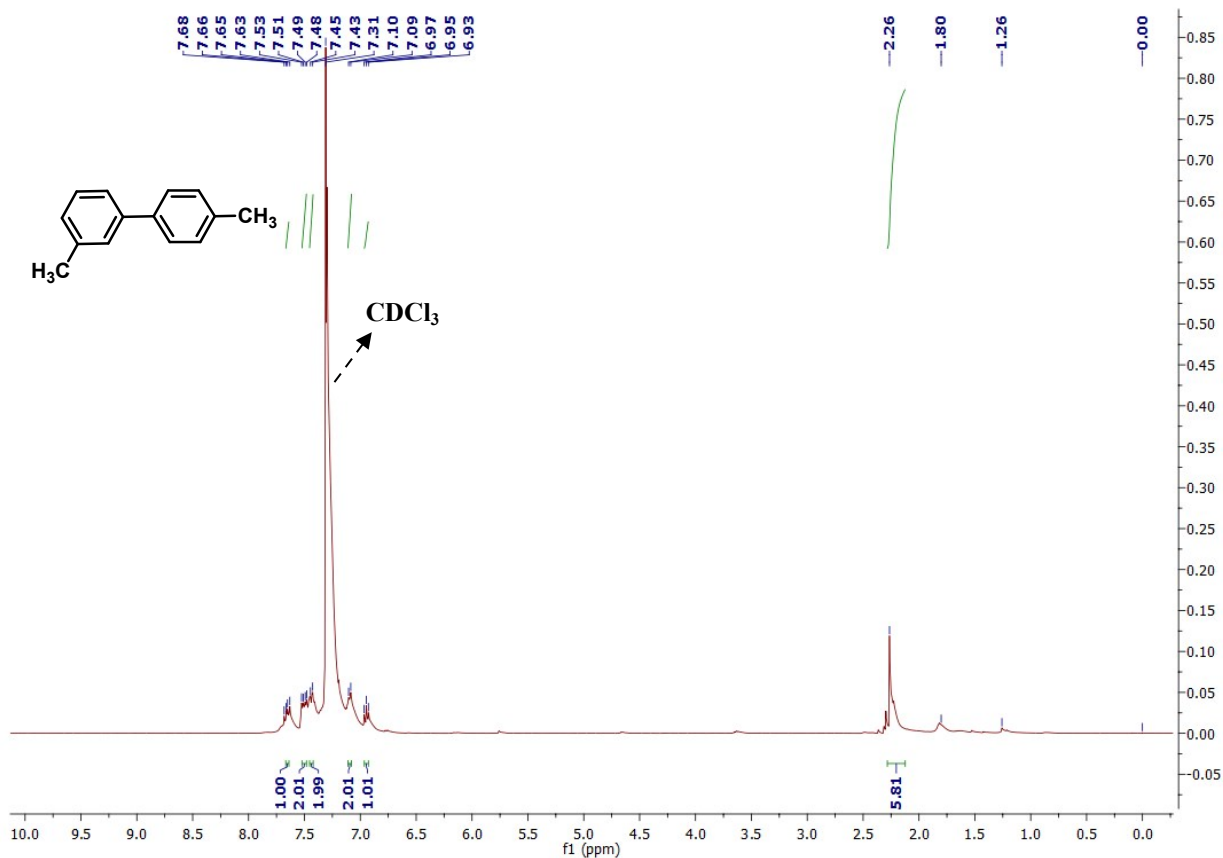

Fig. S18  $^1\text{H-NMR}$  spectra ( $\text{CDCl}_3$ , 400MHz, ppm) of compound 5d.

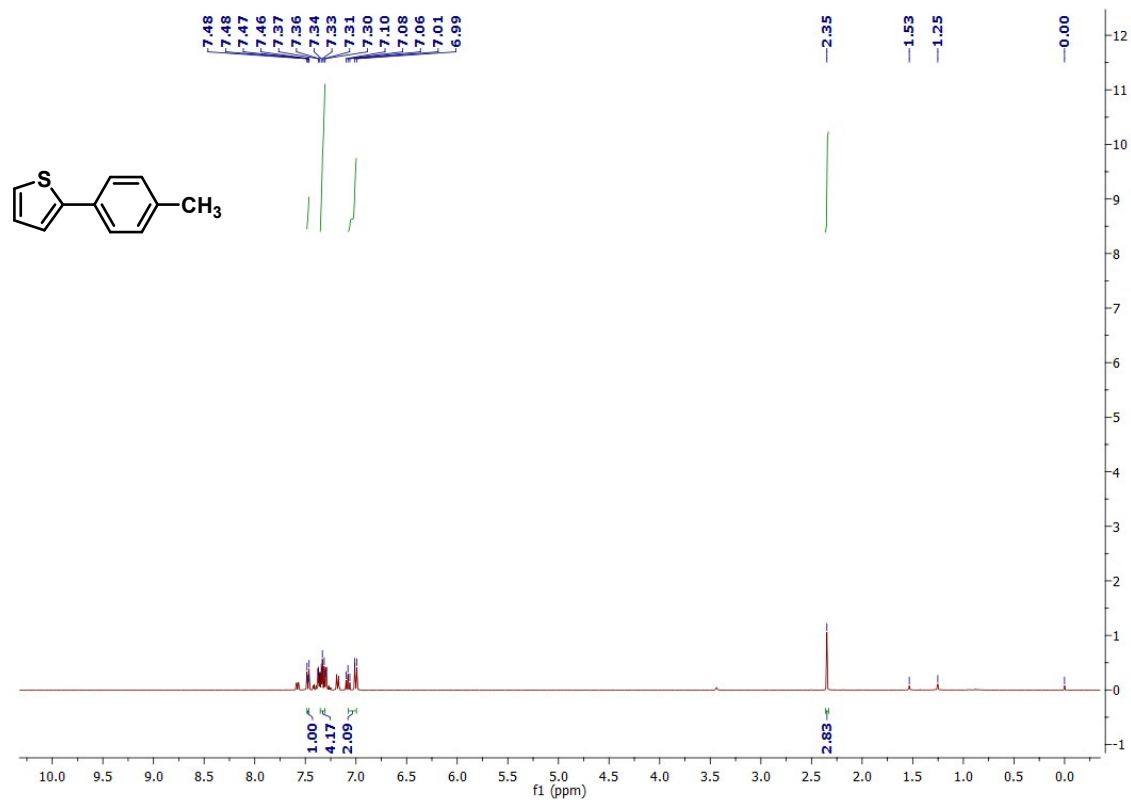

Fig. S19 <sup>1</sup>H-NMR spectra (CDCl<sub>3</sub>, 400MHz, ppm) of compound 5e.

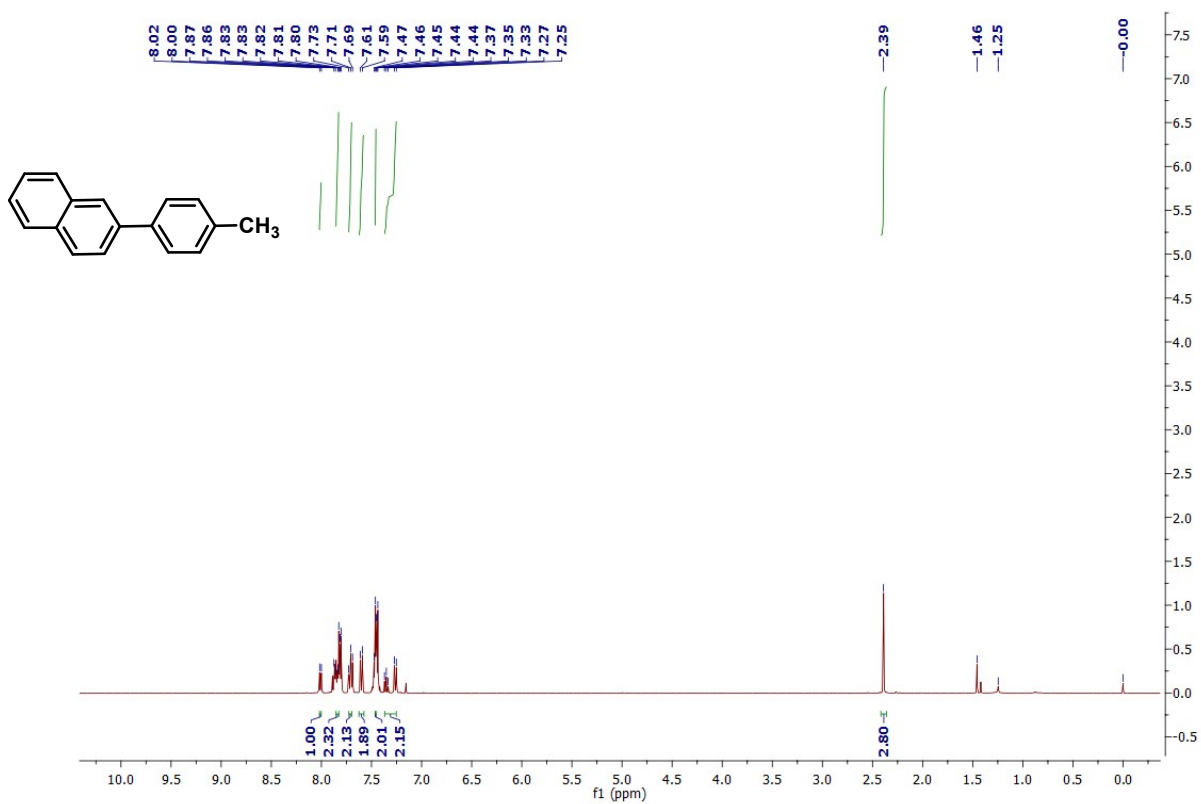

Fig. S20 <sup>1</sup>H-NMR spectra (CDCl<sub>3</sub>, 400MHz, ppm) of compound 5f.

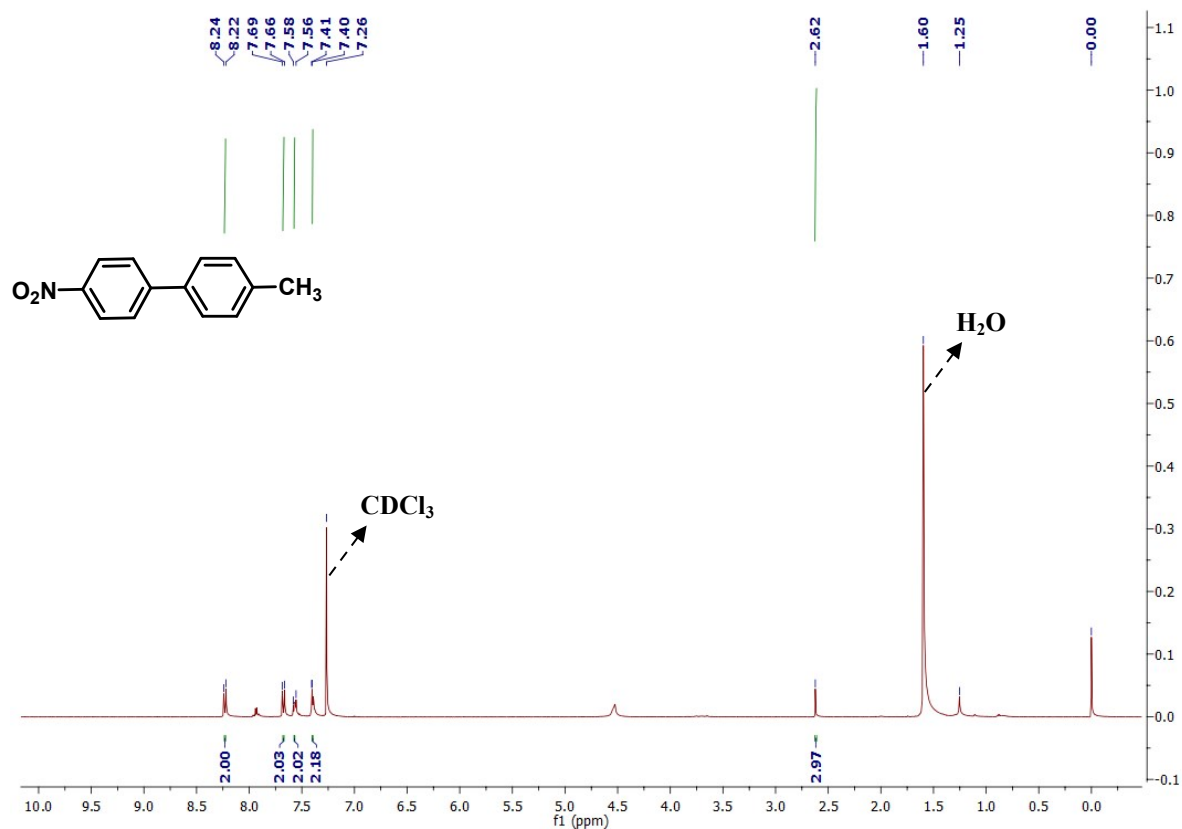

Fig. S21 <sup>1</sup>H-NMR spectra (CDCl<sub>3</sub>, 400MHz, ppm) of compound 5g.

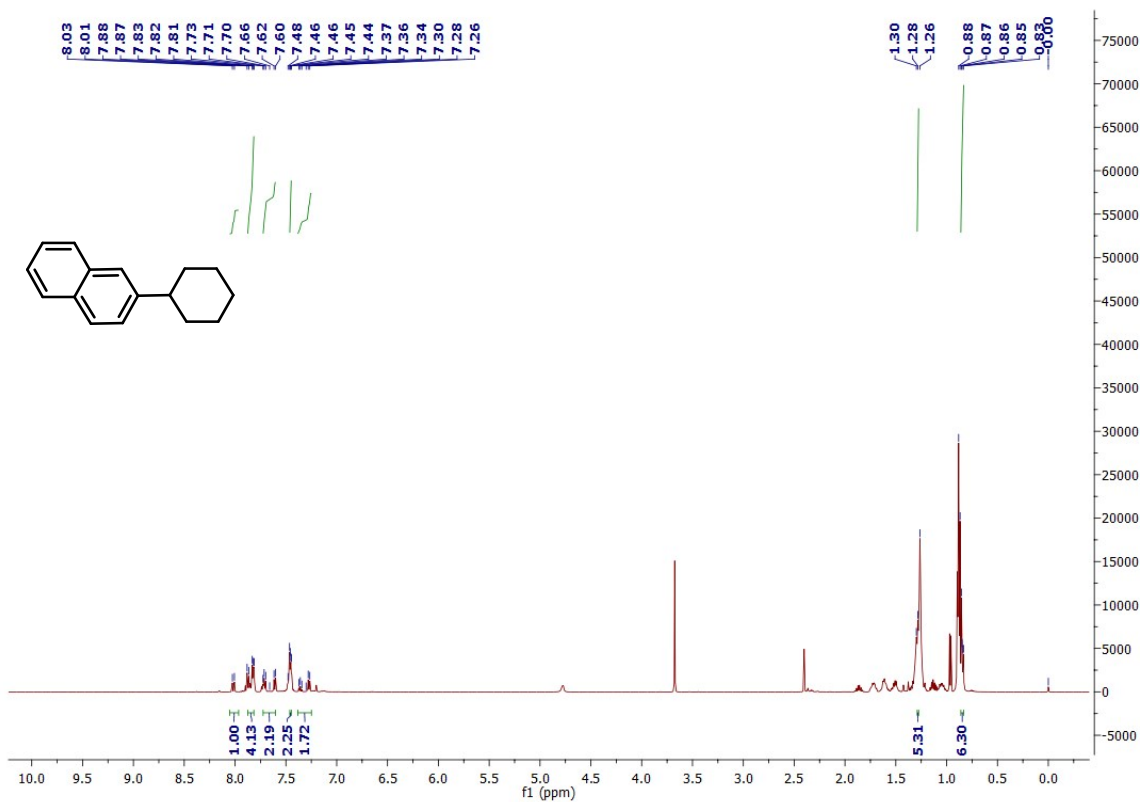

Fig. S22 <sup>1</sup>H-NMR spectra (CDCl<sub>3</sub>, 400MHz, ppm) of compound 5h.



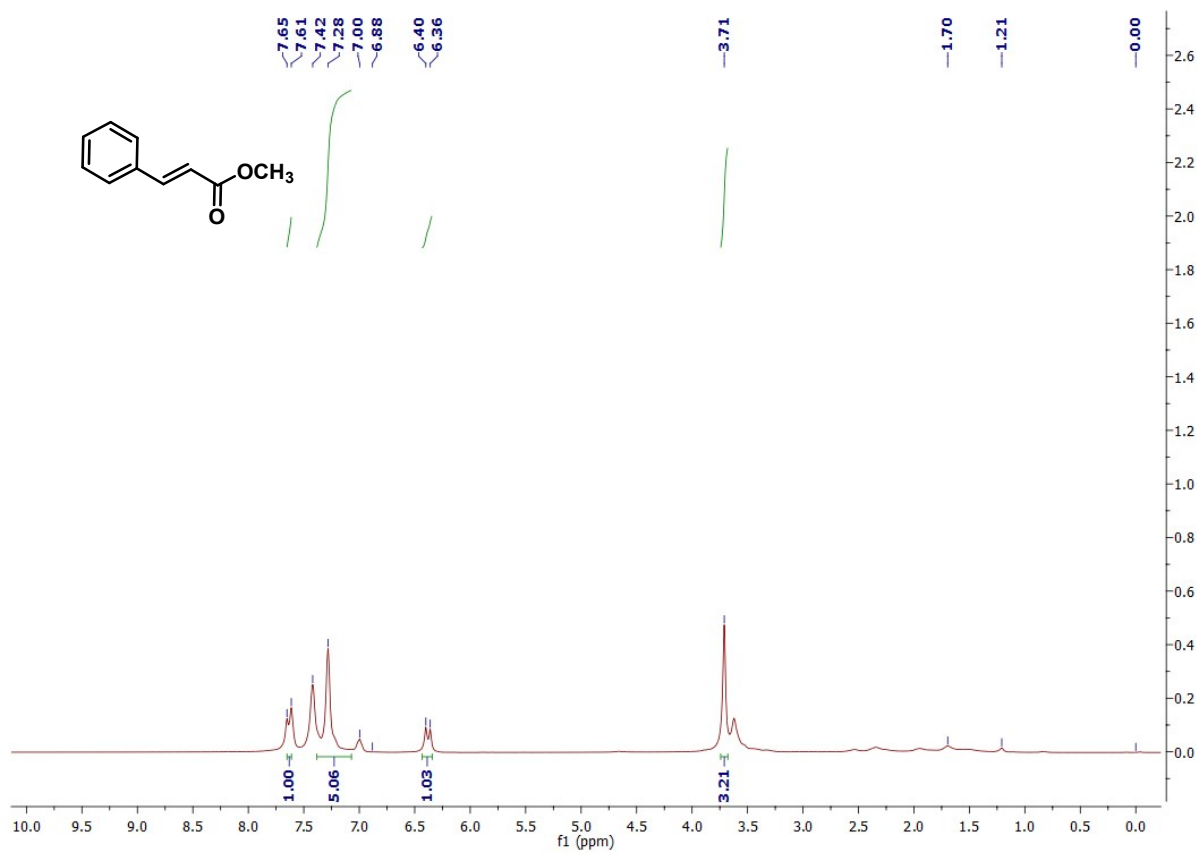

Fig. S23 <sup>1</sup>H-NMR spectra (CDCl<sub>3</sub>, 400MHz, ppm) of compound 8a.

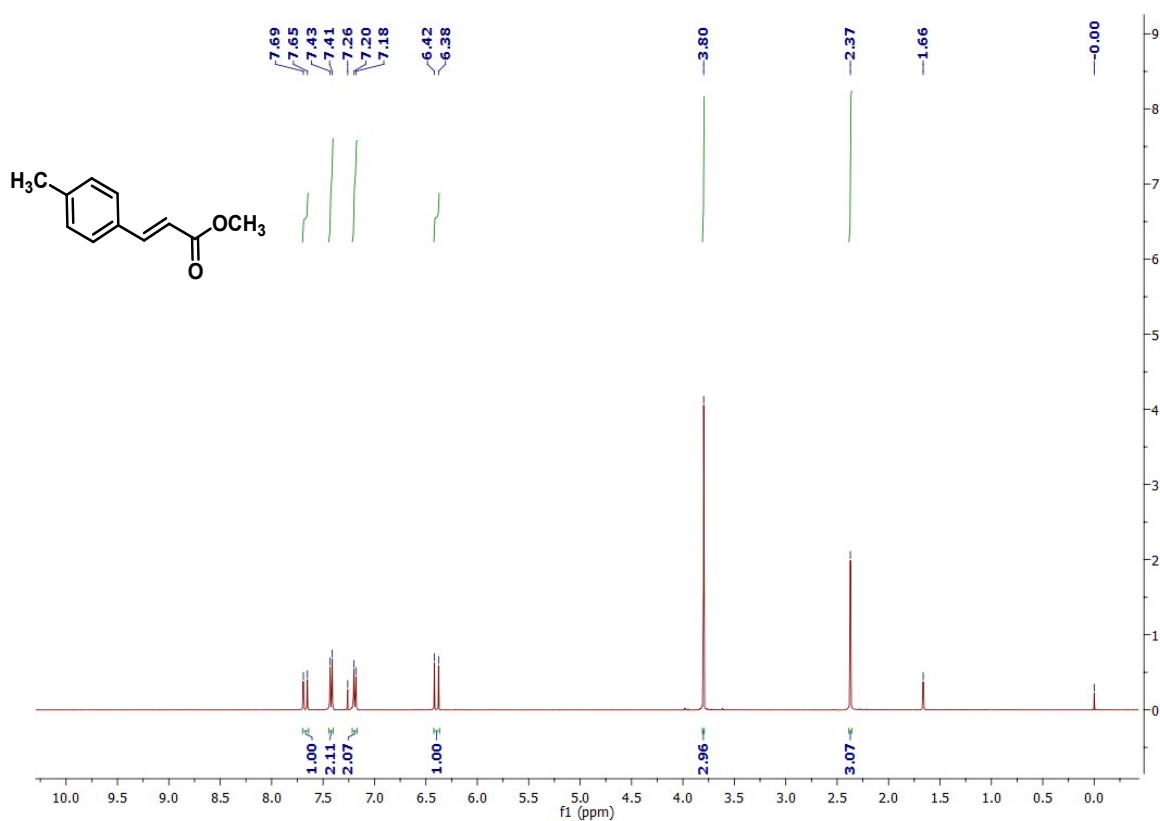

Fig. S24 <sup>1</sup>H-NMR spectra (CDCl<sub>3</sub>, 400MHz, ppm) of compound 8b.

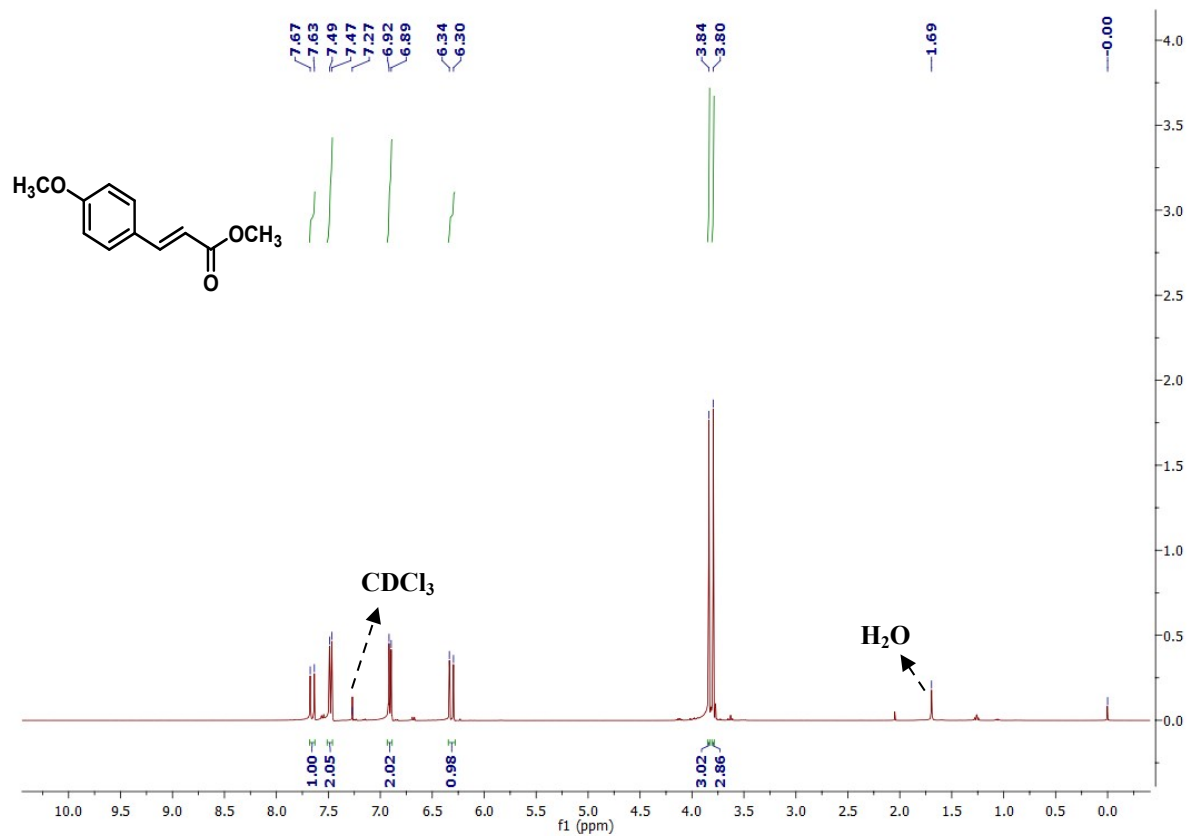

Fig. S25 <sup>1</sup>H-NMR spectra (CDCl<sub>3</sub>, 400MHz, ppm) of compound 8c.

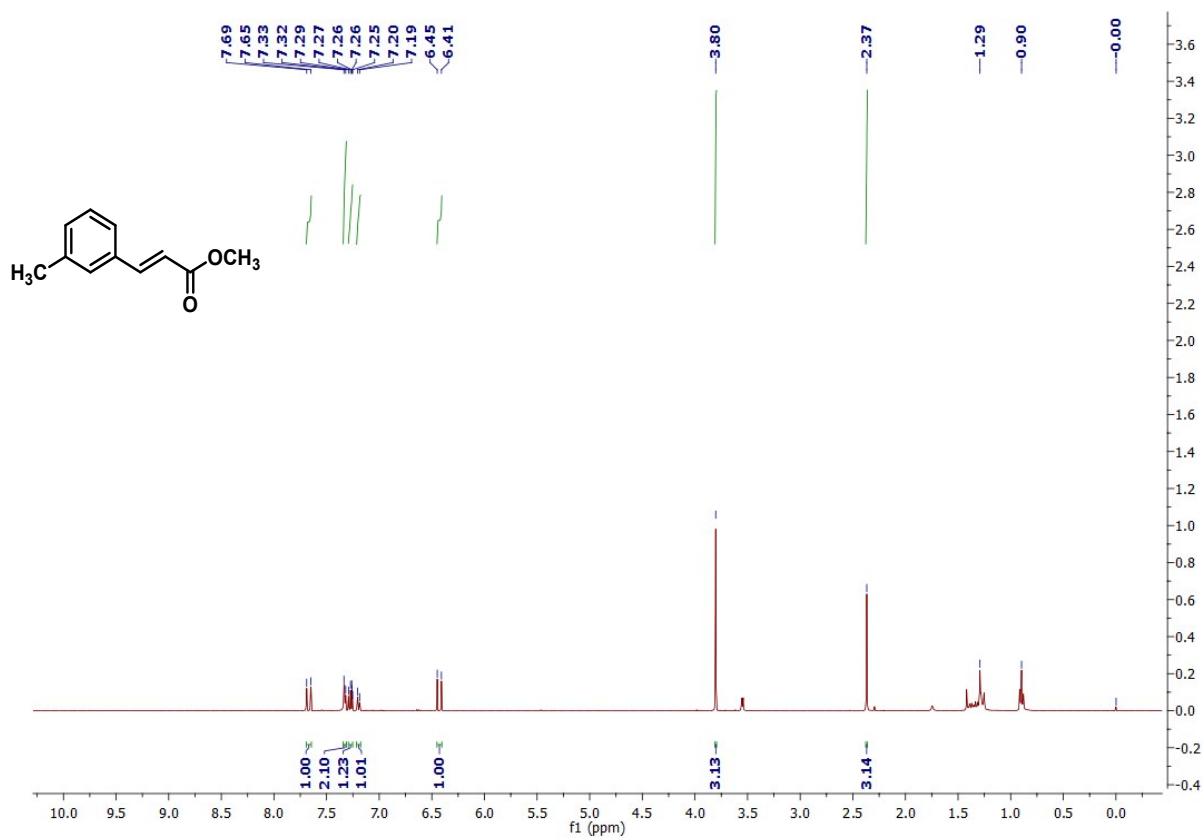

Fig. S26 <sup>1</sup>H-NMR spectra (CDCl<sub>3</sub>, 400MHz, ppm) of compound 8d.

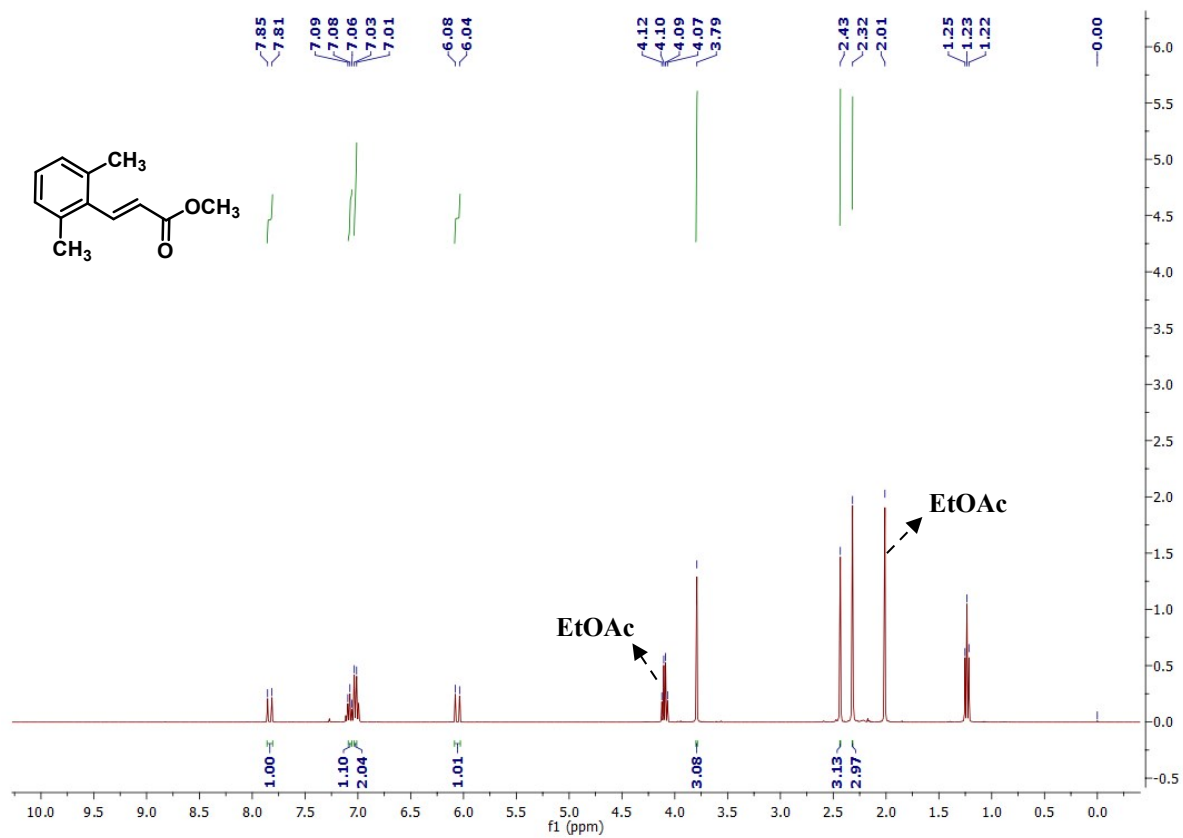

Fig. S27 <sup>1</sup>H-NMR spectra (CDCl<sub>3</sub>, 400MHz, ppm) of compound 8e.

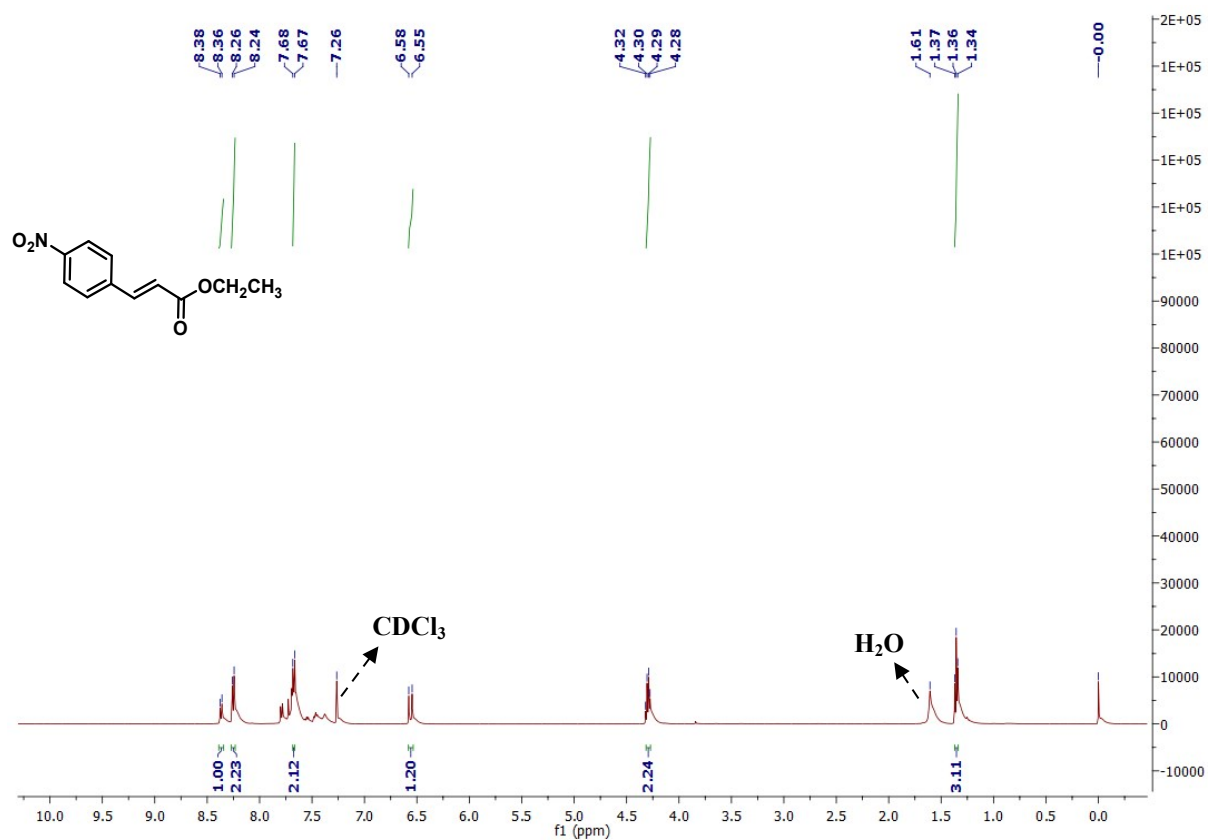

Fig. S28 <sup>1</sup>H-NMR spectra (CDCl<sub>3</sub>, 500MHz, ppm) of compound 8f.

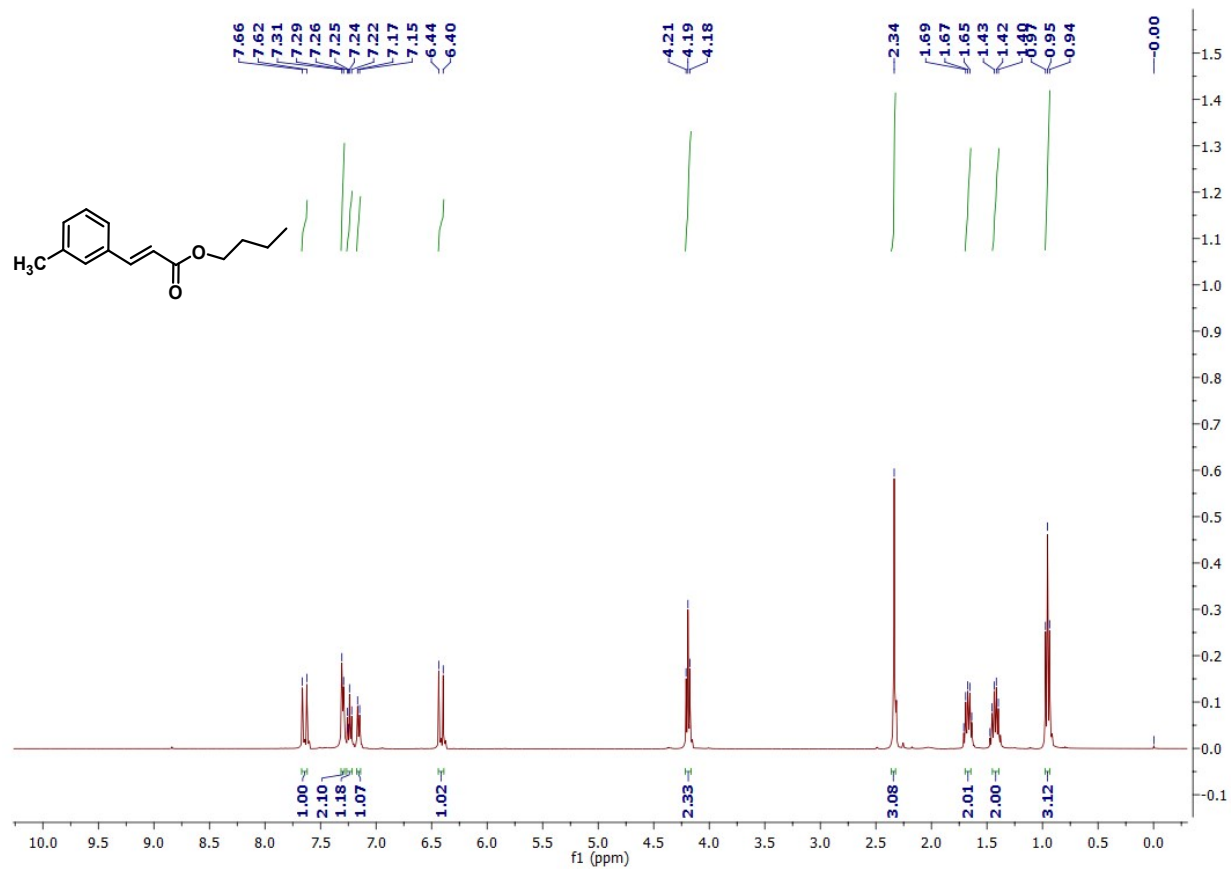

Fig. S29 <sup>1</sup>H-NMR spectra (CDCl<sub>3</sub>, 400MHz, ppm) of compound 8g.

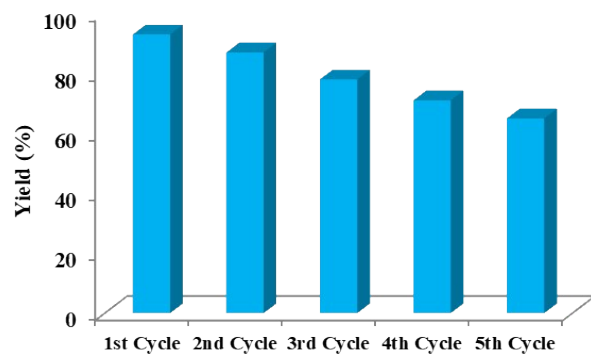

**Fig. S30** Recyclability of **HP-T@Au-Fe<sub>3</sub>O<sub>4</sub>** catalytic system for Kumada coupling reaction.

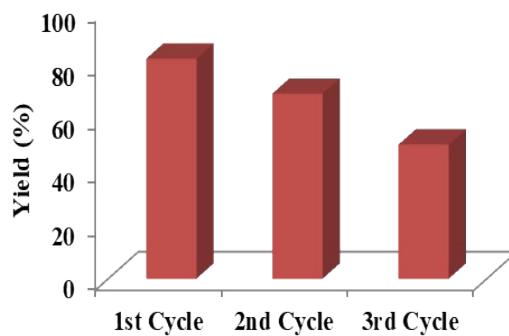

**Fig. S31** Recyclability of **HP-T@Au-Fe<sub>3</sub>O<sub>4</sub>** catalytic system for Heck coupling reaction.

**References:**

1. X. -Q. Zhang and Z. -X. Wang, *J. Org. Chem.*, 2012, **77**, 3658-3663.
2. M. Kuroboshi, Y. Waki and H. Tanaka, *J. Org. Chem.*, 2003, **68**, 3938-3942.
3. S. R. Dubbaka and P. Vogel, *Tetrahedron Lett.*, 2006, **47**, 3345-3348.
4. A. S. Guram, A. O. King, J. G. Allen, X. Wang, L. B. Schenkel, J. Chan, E. E. Bunel, M. M. Faul, R. D. Larsen, M. J. Martinelli and P. Reider, *J. Org. Lett.*, 2006, **8**, 1787-1789.
5. M. Kuriyama, R. Shimazawa and R. Shirai, *Tetrahedron*, 2007, **63**, 9393-9400.
6. K. Shudo, T. Ohta and T. Okatnoto, *J. Am. Chem. Soc.*, 1981, **103**, 645-653.
